# Supplementary material for: One-year longitudinal study of psychological distress and self-assessed health in survivors of out-of-hospital cardiac arrest
Source: PubMed Central journal article supplement — BMJ Open. 2019 Jul 3;9(7):e029756. doi: 10.1136/bmjopen-2019-029756 (PMC6615909; doi:10.1136/bmjopen-2019-029756), 2019-07-03
Supplement: bmjopen-2019-029756.draft_revisions.pdf [file bmjopen-2019-029756.draft_revisions.pdf]

# BMJ Open

BMJ Open is committed to open peer review. As part of this commitment we make the peer review history of every article we publish publicly available.

When an article is published we post the peer reviewers' comments and the authors' responses online. We also post the versions of the paper that were used during peer review. These are the versions that the peer review comments apply to.

The versions of the paper that follow are the versions that were submitted during the peer review process. They are not the versions of record or the final published versions. They should not be cited or distributed as the published version of this manuscript.

BMJ Open is an open access journal and the full, final, typeset and author-corrected version of record of the manuscript is available on our site with no access controls, subscription charges or pay-per-view fees (<http://bmjopen.bmj.com>).

If you have any questions on BMJ Open's open peer review process please email [info.bmjopen@bmj.com](mailto:info.bmjopen@bmj.com)

# BMJ Open

## A one year longitudinal study of psychological distress and self-assessed health in survivors of out-of-hospital cardiac arrest.

|                               |                                                                                                                                                                                                                                                                                                                                                                                                                                                                                                |
|-------------------------------|------------------------------------------------------------------------------------------------------------------------------------------------------------------------------------------------------------------------------------------------------------------------------------------------------------------------------------------------------------------------------------------------------------------------------------------------------------------------------------------------|
| Journal:                      | <i>BMJ Open</i>                                                                                                                                                                                                                                                                                                                                                                                                                                                                                |
| Manuscript ID                 | bmjopen-2019-029756                                                                                                                                                                                                                                                                                                                                                                                                                                                                            |
| Article Type:                 | Research                                                                                                                                                                                                                                                                                                                                                                                                                                                                                       |
| Date Submitted by the Author: | 12-Feb-2019                                                                                                                                                                                                                                                                                                                                                                                                                                                                                    |
| Complete List of Authors:     | Viktorisson, Adam; Goteborgs universitet Institutionen for neurovetenskap och fysiologi, Rehabilitation medicine Sunnerhagen, Katharina; Univ of Gothenburg, Inst of Neuroscience and Physiology<br>Johansson, Dongni; Goteborgs universitet Sahlgrenska Akademin, Department of Clinical Neuroscience at Institute of Neuroscience and Physiology<br>Herlitz, Johan; Faculty of Caring Science, Work Life and Social Welfare, University of Borås<br>Axelsson, Åsa; University of Gothenburg, |
| Keywords:                     | Cardiac arrest, Follow-up, Outcome, Anxiety, Depression, Quality of life                                                                                                                                                                                                                                                                                                                                                                                                                       |
|                               |                                                                                                                                                                                                                                                                                                                                                                                                                                                                                                |

SCHOLARONE™  
Manuscripts

1  
2  
3 **Running headline:** A one year longitudinal study of psychological distress and self-assessed  
4 health in survivors of out-of-hospital cardiac arrest.  
5  
6  
7

8  
9 Adam Viktorisson<sup>1,\*</sup>, Katharina S Sunnerhagen<sup>1</sup>, Dongni Johansson<sup>1</sup>, Johan Herlitz<sup>2,3</sup>, Åsa B  
10 Axelsson<sup>4</sup>  
11  
12  
13  
14  
15

16 1. Institute of Neuroscience and Physiology, Rehabilitation Medicine, Sahlgrenska Academy,  
17 University of Gothenburg, Box 430, SE 405 30 Gothenburg, Sweden.

18 2. Institute of Internal Medicine, Department of Metabolism and Cardiovascular Research,  
19 Sahlgrenska University Hospital, SE 413 45 Gothenburg, Sweden.  
20  
21

22 3. Prehospen Centre of Prehospital Research, Faculty of Caring Science, Work Life and  
23 Social Welfare, University of Borås, Sweden.  
24  
25

26 4. Institute of Health and Care Sciences, Sahlgrenska Academy, University of Gothenburg,  
27 Box 457, SE 405 30 Gothenburg, Sweden.  
28  
29  
30  
31  
32

33 \* Corresponding author: Adam Viktorisson

34 Sahlgrenska Academy,

35 Institute of Neuroscience and Physiology

36 Per Dubbsgatan 14, 3<sup>rd</sup> floor

37 PO Box 430

38 SE 405 30, Gothenburg

39 Sweden.  
40  
41  
42  
43  
44

45 E-mail address: [adam.viktorisson@gu.se](mailto:adam.viktorisson@gu.se)

46 Phone: +46-31-342 2803  
47  
48  
49  
50  
51

52 **Word count:** 2859  
53  
54  
55  
56  
57  
58  
59  
60

## Abstract

*Objectives:* Few studies have investigated the emotional and health-related outcome after out-of-hospital cardiac arrest (OHCA) over time. This longitudinal study aims to evaluate psychological distress, self-assessed health, and predictors of these outcomes in survivors of OHCA, three and 12 months after resuscitation.

*Methods:* Recruitment took place from 2008 to 2011 and survivors of OHCA were identified through the national Swedish Cardiopulmonary Resuscitation Registry. Inclusion criteria were age  $\geq 18$  years, survival  $\geq 12$  months and a Cerebral Performance Category score  $\leq 2$ . Questionnaires containing the Hospital Anxiety and Depression scale (HADS) and European Quality of Life 5 Dimensions 3 Level (EQ-5D-3L) were administered at three and 12 months after the OHCA. Participants were also asked to report treatment-requiring comorbidities.

*Results:* Overall, survivors reported significantly less psychological distress and better self-assessed health at the 12-month follow-up compared to three months, although one-third of the study participants reported an increase in psychological distress over time. Comorbidity was associated with higher levels of anxiety at three months after OHCA, while being female was linked to more psychological distress at 12 months and poor self-assessed health at three months. Young age was associated with poor self-assessed health at both time points.

*Conclusion:* The level of psychological distress and health improve among survivors of OHCA between three and 12 months after resuscitation. Higher levels of psychological distress can be expected among female survivors and those with treatment-requiring comorbidity, while survivors of young age and who are female are at risk of poor self-assessed health.

## Strengths and limitations of this study

- Data were collected from virtually every out-of-hospital cardiac arrest survivor within the course of 4 years in a large region of Sweden.
- A nurse responsible for data collection was placed at each hospital in the region to match survivors with data from the Swedish Cardiopulmonary Resuscitation Registry.
- Only survivors with a cerebral performance category score of  $\leq 2$  were included.
- The use of generic measures of health has a limited ability to capture the complexity of the health state in survivors of cardiac arrest.

1  
2  
3 **Key words:** Cardiac arrest; Follow-up; Outcome; Anxiety; Depression; Quality of life.  
4  
5

## 6 **Introduction**

7  
8 Out-of-hospital cardiac arrest (OHCA) is a deadly condition that affects approximately 5000  
9 inhabitants in Sweden each year (1). The survival rate of OHCA is low, although great efforts  
10 have been made to raise the number of survivors in recent years; consequently, the 30-day  
11 survival rate in Sweden has increased from 4.5% in 1992 to 11.4% in 2017 (2). When the  
12 heart stops anoxic brain injury occurs within minutes and is the most critical factor in  
13 determining the chance of survival and level of functioning, if resuscitation is successful (3).  
14 Following cerebral anoxia, cardiac arrest survivors are known to be at risk of cognitive and  
15 emotional deficits (4-7). Although most survivors with a good neurological outcome return to  
16 high function and quality of life (8, 9), long-term emotional problems have been reported by  
17 up to one-third in Swedish-samples (10, 11). Furthermore, the ability to pinpoint survivors  
18 who need psychiatric rehabilitation will become more important as survival rates continue to  
19 increase.  
20  
21  
22  
23  
24  
25  
26  
27  
28

29 There is already an extensive body of knowledge regarding the outcome after cardiac arrest  
30 in different patient populations and time points. However, few studies have investigated the  
31 emotional and health-related outcome in the same sample over time, and little is known about  
32 factors associated with post cardiac arrest improvement in these aspects (9, 10, 12, 13). The  
33 interpretation of the available literature is complicated by high heterogeneity in study  
34 outcomes, and knowledge regarding psychological distress and self-assessed health after  
35 OHCA in relation to the average population in Sweden is lacking (7, 14).  
36  
37  
38  
39  
40

41 We have previously reported that reduced well-being is experienced by half of OHCA  
42 survivors at three months, and that female survivors report significantly more anxiety and  
43 worse health compared to males (15). In this study, we will investigate how the emotional and  
44 health-related outcomes change in survivors of OHCA with good neurological functioning  
45 between three and 12 months after resuscitation. Further, we will also evaluate predictors of  
46 psychological distress and poor self-assessed health at these time points.  
47  
48  
49  
50  
51  
52  
53  
54  
55  
56  
57  
58  
59  
60

## Methods

### *Design and setting*

This was a longitudinal study with self-administered postal questionnaires sent to survivors three and 12 months after the OHCA. The setting was a region in Sweden with 1.6 million inhabitants and nine hospitals that treat cardiac arrest. The frequency of OHCA was 850 cases annually and the survival rate approximately 10%.

### *Study population*

The study population was identified through the national Swedish Cardiopulmonary Resuscitation Registry (SCRR). Every person who suffered from an OHCA and for whom resuscitation was initiated should be included in the SCRR. To ensure complete coverage, there was a specially-trained nurse at each hospital who could identify missing cases and match patients treated for OHCA with data from the SCRR.

Recruitment took place from 1st January 2008 to 31st December 2011 and every adult survivor of OHCA in the region was assessed for inclusion. The study inclusion criteria were age  $\geq 18$  years, survival  $\geq 12$  months, and a Cerebral Performance Category (CPC) score  $\leq 2$  at discharge, denoting good neurological functioning (16). Exclusion criteria were cardiac arrest due to trauma, attempted suicide, intoxication, or abuse. Survivors with other severe illness and survivors treated but not residing in the region were also excluded.

### *Procedure and questionnaire*

Eligible survivors received a postal questionnaire in Swedish three months after the OHCA. Respondents at three months then received a second questionnaire at 12 months. A reminder was sent if no response was received after three weeks. The questionnaire consisted of the Hospital Anxiety and Depression scale (HADS) and European Quality of Life 5 Dimensions 3 Level (EQ-5D-3L). Study participants were also asked to report treatment-requiring comorbidity.

The HADS is a 14-item screening instrument developed to detect psychological distress in terms of anxiety and/or depression (17). It is divided into two subscales, seven items regarding anxiety (HADS-anxiety) and seven items regarding symptoms of depression (HADS-depression). Each item has four levels, scored 0-3, with a maximum score of 21 in each subscale. Scoring  $>7$  in one subscale indicates mild to moderate problems and a score  $>10$  indicates severe problems. Although the HADS has never been thoroughly evaluated in a

1  
2  
3 cardiac arrest population, it is considered a reliable measurement for depression and anxiety  
4 in patients with somatic illness (18) and is frequently used in cardiovascular research (7).

5  
6 EQ-5D-3L is designed to measure health and includes the EQ-5D-3L descriptive system  
7 and a visual analogue scale (EQ VAS) (19). The descriptive system  
8  
9 comprises five dimensions (mobility, self-care, usual activities, pain/discomfort and  
10 anxiety/depression); each dimension has three levels (no problems, moderate problems and  
11 severe problems) denoting a score of 1-3. The total score in the EQ-5D-3L descriptive system  
12 can be converted to an index-value which ranges between  $-0.594$  and  $1.00$ , calculated with  
13 the UK EQ-5D index tariff (20). An index value of  $1.00$  indicates full health, while negative  
14 values represents health states worse than death (19). EQ VAS is a thermometer where the  
15 patient assesses his or her current health on a scale from zero to 100, with endpoints labelled  
16 'best imaginable health state' and 'worst imaginable health state'. EQ-5D-3L is commonly  
17 used in cardiovascular research (21). However, the use of EQ-5D-3L in OHCA populations  
18 has been questioned as the instrument has shown a limited ability to differentiate between  
19 survivors of good health (22).

### 29 30 31 *Statistics and data analysis*

32 Statistical analyses were executed with IBM SPSS Statistics 24.0 (Armonk, NY: IBM Corp).  
33 All p-values were two-sided and interpreted at a 0.05 significance level. Nonparametric tests  
34 were used for all comparisons as all dependent variables were non-normally distributed. The  
35  $\chi^2$  test was applied for nominal values and the Mann-Whitney U-test for ordinal values.  
36 Wilcoxon signed ranks test was used to explore the change between three and 12 months.  
37 Predictors of psychological distress (HADS) and poor self-assessed health (EQ-5D-3L index  
38 values) were investigated using multivariate binary logistic regression models. The outcome  
39 was dichotomised as good or bad with regard to the mean scores in two Swedish reference  
40 populations, matched to gender and age-group. Reference values regarding the HADS were  
41 drawn from a random sample gathered 1997 in Jämtland County, Sweden ( $n=624$ ) (23);  
42 similarly, reference values regarding the EQ-5D-3L index values were drawn from a random  
43 sample gathered 2001 in Stockholm County, Sweden ( $n=3069$ ) (24). The predictors were  
44 included based on clinical reasoning and are presented in Table 1; correlations between them  
45 were examined using Spearman's rank correlation and only variables with a Spearman's  $\rho \pm$   
46  $\leq 0.7$  were accepted. Univariate analysis was conducted separately between each individual  
47 predictor. The significant level of the univariate analysis was 0.25 and predictors with a p-  
48 value  $> 0.25$  were excluded from further analysis. Hosmer and Lemeshow tests and Receiver  
49  
50  
51  
52  
53  
54  
55  
56  
57  
58  
59  
60

1  
2  
3 Operating Characteristics curves (ROC-curves) were performed to ensure the reliability of the  
4 logistic regression models.  
5  
6  
7

### 8 *Patient and public involvement*

9  
10 None of the included patients were involved in the design or conduction of this study. The  
11 results will be reported to the Health & Medical Care Committee of the Regional Executive  
12 Board, Region Västra Götaland, Sweden.  
13  
14  
15

### 16 *Ethics*

17  
18 Ethical permission was granted by the Regional Ethics Review board, Western Sweden (No.  
19 465-07). Written consent was obtained from all participants.  
20  
21  
22

### 23 **Results**

24  
25 There were 3082 cases of OHCA in the region during the study period, of which 298 were  
26 alive at 30 days. One-hundred-fifty survivors fulfilled the inclusion criteria for a three-month  
27 follow-up and 94 responded. Of the respondents at three months, 85 were included at 12  
28 months and 74 responded again (87% response rate); in the group that did not receive a  
29 second questionnaire, five had died and four were lost due to logistical errors (Figure 1).  
30  
31  
32

33  
34 The representativeness of the study population has been investigated in a prior study (25),  
35 and there were no significant differences regarding age, gender, cardiac arrest circumstances,  
36 or in-hospital interventions between respondents and non-respondents. However, there were  
37 differences between participants and the survivors that only responded once. Double  
38 respondents were significantly younger ( $Z=2.316$ ,  $p=0.021$ ), had a lower frequency of cardiac  
39 arrest at home ( $\chi^2=6.249$ ,  $p=0.014$ ), and a higher frequency of ventricular fibrillation or  
40 ventricular tachycardia as initial rhythm ( $\chi^2=5.067$ ,  $p=0.032$ ). Background characteristics and  
41 self-reported comorbidity of the participants are presented in Table 1.  
42  
43  
44  
45  
46  
47

48 Overall, survivors of OHCA reported a significantly improved emotional and health-related  
49 outcome over time (Table 2). About half of the survivors reported less psychological distress  
50 in the HADS at 12 months (51% decrease in anxiety and 46% in symptoms of depression);  
51 although one-third reported an increase in psychological distress (30% increase in anxiety and  
52 28% in symptoms of depression). Two-thirds of female survivors reported more  
53 psychological distress at the 12-month follow up, corresponding to one-fifth among male  
54 survivors. Comparably, half of the survivors reported better self-assessed health at 12 months  
55 in EQ-5D-3L, whereas 41% reported the same health state at three and 12 months. Among the  
56  
57  
58  
59  
60



1  
2  
3 survivors who remained unchanged, 73% reported an EQ-5D-3L index value of 1.00,  
4 denoting full health at both time points. However, only one survivor entered full health at  
5 both times in EQ VAS (Figure 2).  
6  
7

8 Binary logistic regression analyses were performed to find predictors of psychological  
9 distress and poor self-assessed health (Table 3). The presence of treatment-requiring  
10 comorbidity was found to predict more anxiety at three months after resuscitation (OR 4.07,  
11  $p=0.04$ ), but there was no significant correlation regarding comorbidity at the 12-month  
12 follow-up; instead, being female was found to predict more anxiety (OR 9.23,  $p=0.01$ ) and  
13 more symptoms of depression (OR 14.78,  $p=0.002$ ) at this time. Being female was also found  
14 to predict poor self-assessed health at three months (OR 6.33,  $p=0.04$ ), and there was a  
15 negative correlation between older age and poor self-assessed health at three and 12 months,  
16 respectively (OR 0.91,  $p=0.002$ ; OR 0.93,  $p=0.003$ ).  
17  
18  
19  
20  
21  
22  
23  
24  
25

## 26 Discussion

27 One objective of this study was to investigate how the emotional and health-related outcomes  
28 change between three and 12 months in survivors of OHCA with good neurological  
29 functioning. We found an encouraging progression as survivors at large showed less  
30 psychological distress and better self-assessed health over time. In comparison, participants in  
31 this study even surpassed the average level of depression and self-assessed health in the  
32 Swedish population at their 12-month follow-up (23, 24). However, we also found that even  
33 though about half of OHCA survivors report a decrease in psychological distress between  
34 three and 12 months, almost one-third report increased psychological distress; hence, our  
35 results indicate that the emotional outcome after OHCA may differ considerably on an  
36 individual level.  
37  
38  
39  
40  
41  
42  
43

44 As stated earlier, few prior longitudinal studies have investigated the emotional and health-  
45 related outcomes after cardiac arrest. In accordance with our results, two small sample studies  
46 have previously reported a decrease of anxiety and depressive symptoms in cardiac arrest  
47 survivors over time (13, 26). In contrast, a rather large prospective study found no change in  
48 anxiety or depressive symptoms between one and 12 months (12). It is possible that the  
49 heterogeneity in emotional outcomes observed in this study could explain a part of the  
50 discrepancies in the available literature. As regards self-assessed health, the improvements  
51 seen in this study confirm the results of two previous longitudinal studies (9, 10). However,  
52 these previous studies found that the greatest health-related improvements occurred in the  
53 early stages of recovery, within three months after cardiac arrest (9, 10). Moreover, although  
54  
55  
56  
57  
58  
59  
60

1  
2  
3 the 'minimal clinically important difference' in the HADS and EQ-5D-3L among survivors of  
4 cardiac arrest is unknown, estimates from other patient populations indicate that the  
5 improvements seen in this study might not be clinically noticeable (27, 28).  
6  
7

8 A second objective was to evaluate predictors of psychological distress and poor self-  
9 assessed health after OHCA. Since it is already known that cardiac arrest survivors generally  
10 report few emotional problems and good health, it is difficult to define a threshold for a bad  
11 outcome among those who perform well neurologically. In this study, the outcome was  
12 dichotomised as good or bad in comparison to mean scores from the average Swedish  
13 population. Prior studies have concluded that many survivors reach an emotional state and  
14 health comparable to the average population, although no study has previously investigated  
15 predictors of this outcome (9, 10, 29). In addition, there is also a lack of knowledge regarding  
16 factors associated with post cardiac arrest improvement over time (13, 30). We found that  
17 comorbidity is associated with higher levels of anxiety compared to the average population at  
18 three months after OHCA. However, we did not find a significant correlation between  
19 comorbidity and anxiety or depression at the 12-month follow-up. In contrast, being female  
20 was strongly associated with psychological distress at one year after resuscitation, but this  
21 was not significant at three months. We also found a significant correlation between being  
22 female and poor self-assessed health at three months, while young age was associated with  
23 poor self-assessed health at both three and 12 months.  
24  
25  
26  
27  
28  
29  
30  
31  
32  
33  
34  
35

36 Studies investigating prognostic factors regarding the emotional or health-related outcomes  
37 after cardiac arrest are scarce. However, receiving an ICD has been linked to higher levels  
38 psychological distress (31), but this effect has not been shown in a cardiac arrest population  
39 (12). We did not find any significant correlation regarding ICD in our regression models  
40 either. Young age and being female have previously been associated with anxiety among  
41 cardiac arrest survivors (29), but there were no significant correlation between psychological  
42 distress and age in our study population. Nevertheless, we did find a considerably higher  
43 likelihood of depression among female survivors of OHCA at 12 months, which has not  
44 previously been reported. Also novel is the likelihood of a better self-assessed health among  
45 survivors of higher age.  
46  
47  
48  
49  
50  
51  
52

53 The European Resuscitation Council has provided guidelines for post cardiac arrest  
54 rehabilitation since 2015 and has pointed out the need of structured follow-up care, including  
55 physical, neurological, and emotional screening (32). Still, far from all cardiac arrest  
56 survivors in Sweden are offered rehabilitation or neuropsychological evaluation, despite  
57 recommendations from the Swedish Resuscitation Council (33, 34). Instead, survivors in  
58  
59  
60

1  
2  
3 Sweden are often followed based on the aetiology of the cardiac arrest with little to no focus  
4 on emotional sequelae (34, 35). Our results indicate that even if the majority of OHCA  
5 survivors live without psychological distress and with good self-assessed health, there are  
6 individuals that experience major problems. Consequently, it should be expected that some  
7 survivors will benefit from psychiatric rehabilitation, and survivors of young age, who are  
8 female, and those with treatment-requiring comorbidity should be screened early on.  
9  
10  
11  
12  
13  
14

### 15 *Strengths and limitations*

16 This study has several strengths. During the study period of four years, a specially-trained  
17 nurse was placed at every hospital in a large region of Sweden. With this approach, we were  
18 able to collect data from virtually every case of OHCA. The study design also allowed us to  
19 match non-respondents with data collected from the SCRR at the time of their hospitalisation,  
20 thus enabling comparisons between respondents and non-respondents. Consequently, we were  
21 able to confirm that the study population represents the group at large in these aspects.  
22 Another strength is that the outcomes in this study could be compared with the average  
23 Swedish population. Knowledge regarding factors of importance for an emotional state and  
24 self-assessed health in line with the normal population after OHCA in Sweden is missing.  
25 This information will help to generalise the overall picture of OHCA survival and provide  
26 guidance regarding which survivors that need psychiatric rehabilitation. Furthermore, the  
27 response rate was very high at 12 months.  
28  
29  
30  
31  
32  
33  
34  
35  
36  
37

38 The main limitations of this study are the retrospective design and the restrictive inclusion  
39 of survivors with good neurological functioning, which limits the applicability on OHCA  
40 survivors more broadly. However, we made the assessment that inclusion of survivors with a  
41 severe cerebral dysfunction would complicate the interpretability of the results. Another  
42 methodical limitation in this study is the use of EQ-5D-3L to measure self-assessed health. A  
43 recent study concluded that EQ-5D-3L might underestimate the health in OHCA survivors,  
44 yielding high ceiling effects, which was apparent in the EQ-5D-3L descriptive system in this  
45 study as well (22). Although EQ VAS showed higher interpretability with a more varied  
46 outcome in our study population, it is known that generic measures of health often fail to  
47 capture the true complexity of the health state in survivors of cardiac arrest (36). Finally,  
48 some survivors were excluded due to severe illness and a few non-respondents mentioned  
49 poor health as the reason for not participating. Therefore, it is possible that the participants in  
50 this study had a better outcome than survivors more generally.  
51  
52  
53  
54  
55  
56  
57  
58  
59  
60

## Conclusions

On a group level, there is a significant improvement in the emotional and health-related outcomes among survivors of OHCA between three and 12 months after resuscitation. Higher levels of psychological distress can be expected among female survivors and those with treatment-requiring comorbidity, while young and female survivors are at risk of a poor self-assessed health. These findings should be considered in the follow-up after OHCA, although future research is required to identify further predictors regarding the long-term outcome and chance of improvement post cardiac arrest.

## Funding

Funding was provided as a grant from the Health & Medical Care Committee of the Regional Executive Board (VGFOUREG-78031), Region Västra Götaland, Sweden. The guarantor had no role in the design or execution of this study.

## Acknowledgements

We would like to thank the dedicated nurses who contributed to our collection of data. We would also like to thank Dr. Kate Bramley-Moore for English language editing assistance.

## Competing interests

The authors declare no conflict of interest.

## Contributors

All authors have made a substantial contribution to the conception and design of the study. AV analysed the data and wrote the manuscript with input from all authors. KSS and ÅÅ initiated and planned the study, collected the data, assisted in the interpretation of the data and took part in drafting the manuscript. JH took part in the planning of the study, contributed with external expertise and have continuously revised the manuscript. DJ helped analyze the data and have continuously revised the manuscript.

## Data sharing statement

Due to ethical restrictions, data are available on request. Interested researchers may submit a request for data to the authors (adam.viktorisson@gu.se). According to Swedish regulation: <http://www.epn.se/en/start/regulations/>, the permission to use data is only for what has been

1  
2  
3  
4  
5  
6  
7  
8  
9  
10  
11  
12  
13  
14  
15  
16  
17  
18  
19  
20  
21  
22  
23  
24  
25  
26  
27  
28  
29  
30  
31  
32  
33  
34  
35  
36  
37  
38  
39  
40  
41  
42  
43  
44  
45  
46  
47  
48  
49  
50  
51  
52  
53  
54  
55  
56  
57  
58  
59  
60

applied for and then approved by the Ethical board. To not follow the regulations is seen as scientific misconduct.

For peer review only

## References

1. Stromsoe A, Svensson L, Axelsson AB, Claesson A, Goransson KE, Nordberg P, et al. Improved outcome in Sweden after out-of-hospital cardiac arrest and possible association with improvements in every link in the chain of survival. *European heart journal*. 2015;36(14):863-71.
2. Herlitz J. The Swedish national registry for cardiopulmonary resuscitation - Annual report 2017. Gothenburg; 2017.
3. Nolan JP, Neumar RW, Adrie C, Aibiki M, Berg RA, Bottiger BW, et al. Post-cardiac arrest syndrome: epidemiology, pathophysiology, treatment, and prognostication. A Scientific Statement from the International Liaison Committee on Resuscitation; the American Heart Association Emergency Cardiovascular Care Committee; the Council on Cardiovascular Surgery and Anesthesia; the Council on Cardiopulmonary, Perioperative, and Critical Care; the Council on Clinical Cardiology; the Council on Stroke. *Resuscitation*. 2008;79(3):350-79.
4. Lilja G, Nielsen N, Bro-Jeppesen J, Dunford H, Friberg H, Hofgren C, et al. Return to Work and Participation in Society After Out-of-Hospital Cardiac Arrest. *Circulation Cardiovascular quality and outcomes*. 2018;11(1):e003566.
5. Moolaert VR, Verbunt JA, van Heugten CM, Wade DT. Cognitive impairments in survivors of out-of-hospital cardiac arrest: a systematic review. *Resuscitation*. 2009;80(3):297-305.
6. Wachelder EM, Moolaert VR, van Heugten C, Verbunt JA, Bekkers SC, Wade DT. Life after survival: long-term daily functioning and quality of life after an out-of-hospital cardiac arrest. *Resuscitation*. 2009;80(5):517-22.
7. Wilder Schaaf KP, Artman LK, Peberdy MA, Walker WC, Ornato JP, Gossip MR, et al. Anxiety, depression, and PTSD following cardiac arrest: a systematic review of the literature. *Resuscitation*. 2013;84(7):873-7.
8. Green CR, Botha JA, Tiruvoipati R. Cognitive function, quality of life and mental health in survivors of our-of-hospital cardiac arrest: a review. *Anaesthesia and intensive care*. 2015;43(5):568-76.
9. Moolaert VRM, van Heugten CM, Gorgels TPM, Wade DT, Verbunt JA. Long-term Outcome After Survival of a Cardiac Arrest: A Prospective Longitudinal Cohort Study. *Neurorehabilitation and neural repair*. 2017;31(6):530-9.
10. Lundgren-Nilsson A, Rosen H, Hofgren C, Sunnerhagen KS. The first year after successful cardiac resuscitation: function, activity, participation and quality of life. *Resuscitation*. 2005;66(3):285-9.
11. Sunnerhagen KS, Johansson O, Herlitz J, Grimby G. Life after cardiac arrest; a retrospective study. *Resuscitation*. 1996;31(2):135-40.
12. Kamphuis HC, De Leeuw JR, Derksen R, Hauer R, Winnubst JA. A 12-month quality of life assessment of cardiac arrest survivors treated with or without an implantable cardioverter defibrillator. *Europace : European pacing, arrhythmias, and cardiac electrophysiology : journal of the working groups on cardiac pacing, arrhythmias, and cardiac cellular electrophysiology of the European Society of Cardiology*. 2002;4(4):417-25.
13. Sauve MJ, Doolittle N, Walker JA, Paul SM, Scheinman MM. Factors associated with cognitive recovery after cardiopulmonary resuscitation. *American journal of critical care : an official publication, American Association of Critical-Care Nurses*. 1996;5(2):127-39.
14. Whitehead L, Perkins GD, Clarey A, Haywood KL. A systematic review of the outcomes reported in cardiac arrest clinical trials: the need for a core outcome set. *Resuscitation*. 2015;88:150-7.

15. Viktorisson A, Sunnerhagen KS, Poder U, Herlitz J, Axelsson AB. Well-being among survivors of out-of-hospital cardiac arrest: a cross-sectional retrospective study in Sweden. *BMJ open*. 2018;8(6):e021729.
16. Jennett B, Bond M. Assessment of outcome after severe brain damage. *Lancet* (London, England). 1975;1(7905):480-4.
17. Zigmond AS, Snaith RP. The hospital anxiety and depression scale. *Acta psychiatrica Scandinavica*. 1983;67(6):361-70.
18. Bjelland I, Dahl AA, Haug TT, Neckelmann D. The validity of the Hospital Anxiety and Depression Scale. An updated literature review. *Journal of psychosomatic research*. 2002;52(2):69-77.
19. The EuroQol Group. EuroQol--a new facility for the measurement of health-related quality of life. *Health policy (Amsterdam, Netherlands)*. 1990;16(3):199-208.
20. Sullivan PW, Slejko JF, Sculpher MJ, Ghushchyan V. Catalogue of EQ-5D scores for the United Kingdom. *Medical decision making : an international journal of the Society for Medical Decision Making*. 2011;31(6):800-4.
21. Dyer MT, Goldsmith KA, Sharples LS, Buxton MJ. A review of health utilities using the EQ-5D in studies of cardiovascular disease. *Health and quality of life outcomes*. 2010;8:13.
22. Andrew E, Nehme Z, Bernard S, Smith K. Comparison of health-related quality of life and functional recovery measurement tools in out-of-hospital cardiac arrest survivors. *Resuscitation*. 2016;107:57-64.
23. Lisspers J, Nygren A, Soderman E. Hospital Anxiety and Depression Scale (HAD): some psychometric data for a Swedish sample. *Acta psychiatrica Scandinavica*. 1997;96(4):281-6.
24. Burstrom K, Johannesson M, Diderichsen F. Swedish population health-related quality of life results using the EQ-5D. *Quality of life research : an international journal of quality of life aspects of treatment, care and rehabilitation*. 2001;10(7):621-35.
25. Axelsson AB, Sunnerhagen KS, Herlitz J. Representativity and co-morbidity: Two factors of importance when reporting health status among survivors of cardiac arrest. *Resuscitation*. 2016;101:44-9.
26. Dougherty CM. Longitudinal recovery following sudden cardiac arrest and internal cardioverter defibrillator implantation: survivors and their families. *American journal of critical care : an official publication, American Association of Critical-Care Nurses*. 1994;3(2):145-54.
27. Pickard AS, Neary MP, Cella D. Estimation of minimally important differences in EQ-5D utility and VAS scores in cancer. *Health and quality of life outcomes*. 2007;5:70.
28. Puhan MA, Frey M, Buchi S, Schunemann HJ. The minimal important difference of the hospital anxiety and depression scale in patients with chronic obstructive pulmonary disease. *Health and quality of life outcomes*. 2008;6:46.
29. Lilja G, Nilsson G, Nielsen N, Friberg H, Hassager C, Koopmans M, et al. Anxiety and depression among out-of-hospital cardiac arrest survivors. *Resuscitation*. 2015;97:68-75.
30. Verberne D, Moolaert V, Verbunt J, van Heugten C. Factors predicting quality of life and societal participation after survival of a cardiac arrest: A prognostic longitudinal cohort study. *Resuscitation*. 2018;123:51-7.
31. Magyar-Russell G, Thombs BD, Cai JX, Baveja T, Kuhl EA, Singh PP, et al. The prevalence of anxiety and depression in adults with implantable cardioverter defibrillators: a systematic review. *Journal of psychosomatic research*. 2011;71(4):223-31.
32. Nolan JP, Soar J, Cariou A, Cronberg T, Moolaert VR, Deakin CD, et al. European Resuscitation Council and European Society of Intensive Care Medicine Guidelines

1  
2  
3 for Post-resuscitation Care 2015: Section 5 of the European Resuscitation Council Guidelines  
4 for Resuscitation 2015. Resuscitation. 2015;95:202-22.

5 33. Swedish Resuscitation Council - Post Cardiac Arrest Consult Team. Swedish  
6 guidelines for follow-up after cardiac arrest. 2016.

7  
8 34. Israelsson J, Lilja G, Bremer A, Stevenson-Agren J, Arestedt K. Post cardiac  
9 arrest care and follow-up in Sweden - a national web-survey. BMC nursing. 2016;15:1.

10 35. Egerod I, Risom SS, Thomsen T, Storli SL, Eskerud RS, Holme AN, et al. ICU-  
11 recovery in Scandinavia: a comparative study of intensive care follow-up in Denmark,  
12 Norway and Sweden. Intensive & critical care nursing. 2013;29(2):103-11.

13 36. Haywood K, Whitehead L, Nadkarni VM, Achana F, Beesems S, Bottiger BW,  
14 et al. COSCA (Core Outcome Set for Cardiac Arrest) in Adults: An Advisory Statement From  
15 the International Liaison Committee on Resuscitation. Circulation. 2018;137(22):e783-e801.  
16  
17  
18  
19  
20  
21  
22  
23  
24  
25  
26  
27  
28  
29  
30  
31  
32  
33  
34  
35  
36  
37  
38  
39  
40  
41  
42  
43  
44  
45  
46  
47  
48  
49  
50  
51  
52  
53  
54  
55  
56  
57  
58  
59  
60



1  
2  
3 **Figure legends**  
4  
5

6 **Figure 1.** Flowchart of study participants.  
7  
8  
9

10 **Figure 2.** Reported outcomes in the HADS and EQ-5D-3L at three and 12 months (n=74).  
11 Diagonal lines divide the participants with regard to what time they reported the highest  
12 score. Scores from 7 participants are missing in EQ VAS.  
13  
14  
15  
16  
17  
18  
19  
20  
21  
22  
23  
24  
25  
26  
27  
28  
29  
30  
31  
32  
33  
34  
35  
36  
37  
38  
39  
40  
41  
42  
43  
44  
45  
46  
47  
48  
49  
50  
51  
52  
53  
54  
55  
56  
57  
58  
59  
60

For peer review only

**Table 1.** Background characteristics and self-reported comorbidity of participants.

| <i>n (%) unless otherwise stated</i>     | <b>Participants</b><br>n=74 | <b>Missing</b><br><b>data*</b> |
|------------------------------------------|-----------------------------|--------------------------------|
| Age. Median (min-max) <sup>a</sup>       | 63 (25-89)                  |                                |
| Female <sup>a</sup>                      | 13 (18)                     |                                |
| Time to EMS in minutes. Median (min-max) | 7 (1-61)                    | 11                             |
| <b>Cardiac arrest circumstances</b>      |                             |                                |
| Cardiac aetiology <sup>a</sup>           | 62 (86)                     | 2                              |
| Cardiac arrest at home                   | 22 (30)                     |                                |
| CPR before arrival of EMS                | 41 (55)                     |                                |
| Initial rhythm: VF or VT                 | 61 (86)                     | 3                              |
| Witnessed cardiac arrest                 | 69 (95)                     | 1                              |
| <b>In-hospital interventions</b>         |                             |                                |
| CABG                                     | 5 (7)                       | 2                              |
| ICD <sup>a</sup>                         | 19 (27)                     | 4                              |
| Induced hypothermia (33°C) <sup>a</sup>  | 35 (49)                     | 2                              |
| PCI                                      | 39 (54)                     | 2                              |
| <b>Comorbidity**<sup>a</sup></b>         |                             |                                |
| Anaemia or other blood disease           | 0                           |                                |
| Back pain                                | 3 (4)                       |                                |
| Cancer                                   | 1 (1)                       |                                |
| Diabetes mellitus                        | 2 (3)                       |                                |
| Gastrointestinal disease                 | 5 (7)                       |                                |
| Heart disease                            | 54 (73)                     |                                |
| Hypertension                             | 27 (36)                     |                                |

|    |                      |       |
|----|----------------------|-------|
| 1  |                      |       |
| 2  |                      |       |
| 3  | Liver disease        | 1 (1) |
| 4  |                      |       |
| 5  | Osteoarthritis       | 2 (3) |
| 6  |                      |       |
| 7  | Pulmonary disease    | 3 (4) |
| 8  |                      |       |
| 9  | Renal disease        | 0     |
| 10 |                      |       |
| 11 | Rheumatoid arthritis | 1 (1) |
| 12 |                      |       |
| 13 | <hr/>                |       |

14 \* Number of participants where information is missing

15 \*\* Number of participants with self-reported treatment-requiring comorbidity

16  
17 <sup>a</sup> Variables included as predictors in the univariate regression analyses

18  
19  
20 Abbreviations: VF, ventricular fibrillation; VT ventricular tachycardia; CRP,  
21 cardiopulmonary resuscitation; EMS, emergency medical service; PCI,  
22 percutaneous coronary intervention; CABG, coronary artery bypass grafting; ICD,  
23 implantable cardioverter defibrillator  
24  
25  
26  
27  
28  
29  
30  
31  
32  
33  
34  
35  
36  
37  
38  
39  
40  
41  
42  
43  
44  
45  
46  
47  
48  
49  
50  
51  
52  
53  
54  
55  
56  
57  
58  
59  
60

**Table 2.** Comparison of mean scores at three and 12 months in the HADS and EQ-5D-3L (n=74).

|                 | <b>3 months</b>    | <b>12 months</b>   | <i>Z</i> -value | <i>p</i> |
|-----------------|--------------------|--------------------|-----------------|----------|
|                 | Observed mean (SD) | Observed mean (SD) |                 |          |
| <b>HADS</b>     |                    |                    |                 |          |
| HADS-Anxiety    | 5.6 (±4.8)         | 4.7 (±4.3)         | 2.337           | 0.02*    |
| HADS-Depression | 3.4 (±3.5)         | 2.6 (±2.6)         | 2.199           | 0.03*    |
| Total score     | 9.0 (±7.8)         | 7.3 (±6.5)         | 2.579           | 0.01*    |
| <b>EQ-5D-3L</b> |                    |                    |                 |          |
| EQ VAS (n=67)   | 73 (±18)           | 77 (±19)           | 2.292           | 0.02*    |
| Index value     | 0.82 (±0.26)       | 0.88 (±0.15)       | 2.966           | 0.003*   |

\*  $p < 0.05$  indicates statistical significance

Abbreviations: HADS, hospital anxiety and depression scale; EQ-5D-3L, European quality of life 5 dimensions 3 level; SD, standard deviation; VAS, visual analogue scale

**Table 3.** Predictors of psychological distress and poor self-assessed health (n=70).

| Predictors                  | 3 months          |      |          |                       | 12 months          |      |          |                       |
|-----------------------------|-------------------|------|----------|-----------------------|--------------------|------|----------|-----------------------|
|                             | OR (95% CI)       | SE   | <i>p</i> | <i>R</i> <sup>2</sup> | OR (95% CI)        | SE   | <i>p</i> | <i>R</i> <sup>2</sup> |
| <b>HADS-Anxiety</b>         |                   |      |          |                       |                    |      |          |                       |
| Age                         | 0.99 (0.95-1.03)  | 0.02 | 0.63     | 0.195                 | 0.98 (0.93-1.03)   | 0.02 | 0.40     | 0.276                 |
| Comorbidity                 | 4.07 (1.07-17.00) | 0.73 | 0.04*    |                       | 3.79 (0.70-20.42)  | 0.86 | 0.12     |                       |
| Being female                | 4.94 (0.91-26.83) | 0.86 | 0.06     |                       | 9.23 (1.68-50.61)  | 0.78 | 0.01*    |                       |
| Hypothermia                 | 1.25 (0.43-3.62)  | 0.54 | 0.68     |                       | 1.20 (0.38-3.76)   | 0.58 | 0.75     |                       |
| <b>HADS-Depression</b>      |                   |      |          |                       |                    |      |          |                       |
| Age                         | 0.99 (0.94-1.04)  | 0.03 | 0.57     | 0.136                 | 0.99 (0.94-1.05)   | 0.03 | 0.81     | 0.300                 |
| Comorbidity                 | 1.45 (0.33-6.44)  | 0.76 | 0.62     |                       | 1.20 (0.25-5.85)   | 0.81 | 0.82     |                       |
| Being female                | 3.71 (0.90-15.37) | 0.78 | 0.07     |                       | 14.78 (2.60-83.87) | 0.87 | 0.002*   |                       |
| Hypothermia                 | 1.16 (0.37-3.61)  | 0.58 | 0.81     |                       | 2.75 (0.82-9.28)   | 0.62 | 0.10     |                       |
| ICD                         | 1.52 (0.40-5.69)  | 0.68 | 0.54     |                       | 0.55 (0.11-2.77)   | 0.82 | 0.47     |                       |
| <b>EQ-5D-3L index value</b> |                   |      |          |                       |                    |      |          |                       |
| Age                         | 0.91 (0.86-0.97)  | 0.03 | 0.002*   | 0.362                 | 0.93 (0.89-0.98)   | 0.02 | 0.003*   | 0.288                 |
| Comorbidity                 | 1.19 (0.28-5.01)  | 0.73 | 0.81     |                       | 2.53 (0.51-12.69)  | 0.82 | 0.26     |                       |
| Being female                | 6.33 (1.03-38.81) | 0.93 | 0.04*    |                       | 2.09 (0.46-9.40)   | 0.77 | 0.34     |                       |

1  
2  
3  
4 \*  $p < 0.05$  indicates statistical significance  
5  
6

---

7 Abbreviations: HADS, hospital anxiety and depression scale; EQ-5D-3L, European quality of life 5 dimensions 3 level; OR,  
8 odds ratio; SE, standard error; CI, confidence interval; ICD, implantable cardioverter defibrillator; PCI, percutaneous coronary  
9 intervention  
10  
11

---

12  
13  
14  
15  
16  
17  
18  
19  
20  
21  
22  
23  
24  
25  
26  
27  
28  
29  
30  
31  
32  
33  
34  
35  
36  
37  
38  
39  
40  
41  
42  
43  
44  
45  
46  
47  
48  
49  
50  
51  
52  
53  
54  
55  
56  
57  
58  
59  
60

For peer review only

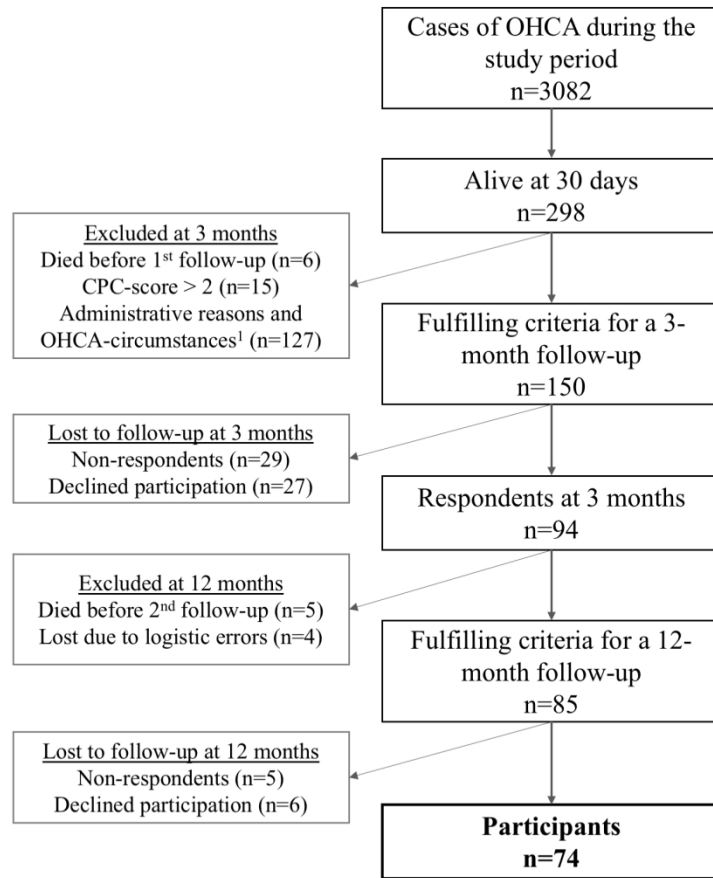

<sup>1)</sup> Administrative reasons include survivors documented with an incorrect social security number, not able to be identified within 3 months or not residing in the region. OHCA-circumstances include trauma, attempted suicide, drowning and intoxication as cause of the cardiac arrest or severe illness afterwards.

Figure 1. Flowchart of study participants.

249x299mm (190 x 190 DPI)

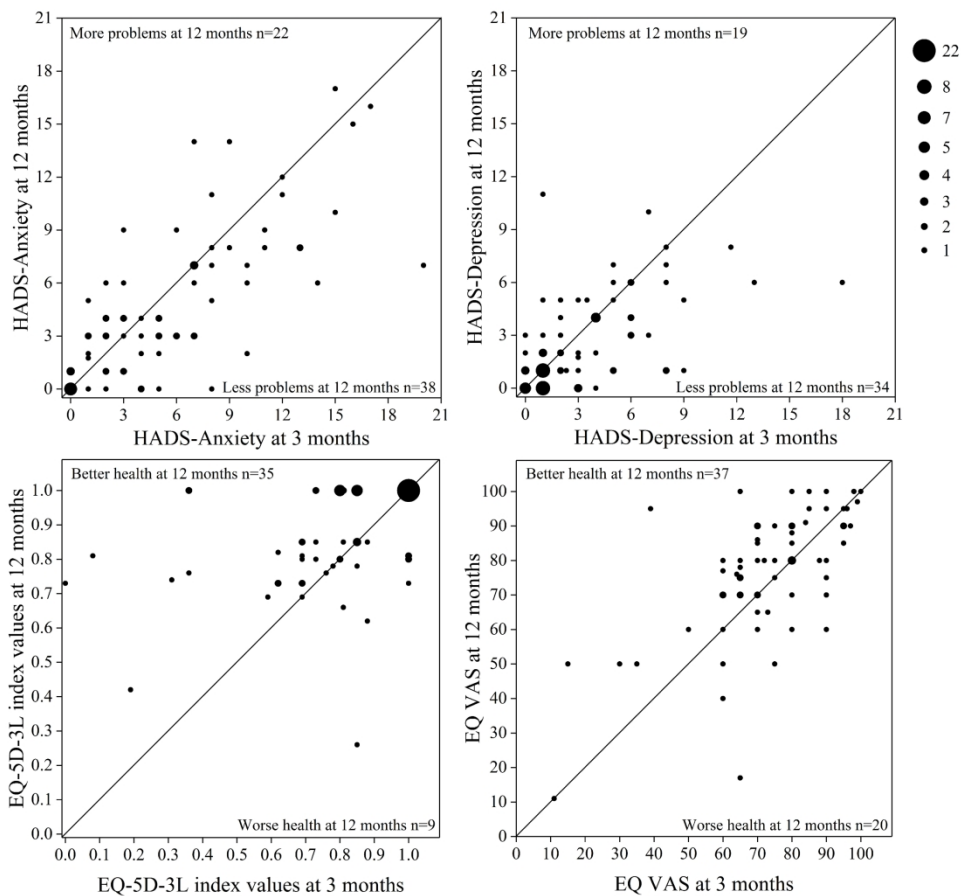

Figure 2. Reported outcomes in the HADS and EQ-5D-3L at three and 12 months (n=74). Diagonal lines divide the participants with regard to what time they reported the highest score. Scores from 7 participants are missing in EQ VAS.

245x245mm (300 x 300 DPI)



**STROBE 2007 (v4) checklist of items to be included in reports of observational studies in epidemiology\***  
**Checklist for cohort, case-control, and cross-sectional studies (combined)**

| Section/Topic             | Item # | Recommendation                                                                                                                                                                                                                                                                                                                                                                                                                                                         | Reported on page #     |
|---------------------------|--------|------------------------------------------------------------------------------------------------------------------------------------------------------------------------------------------------------------------------------------------------------------------------------------------------------------------------------------------------------------------------------------------------------------------------------------------------------------------------|------------------------|
| Title and abstract        | 1      | (a) Indicate the study's design with a commonly used term in the title or the abstract                                                                                                                                                                                                                                                                                                                                                                                 | 1                      |
|                           |        | (b) Provide in the abstract an informative and balanced summary of what was done and what was found                                                                                                                                                                                                                                                                                                                                                                    | 2                      |
| <b>Introduction</b>       |        |                                                                                                                                                                                                                                                                                                                                                                                                                                                                        |                        |
| Background/rationale      | 2      | Explain the scientific background and rationale for the investigation being reported                                                                                                                                                                                                                                                                                                                                                                                   | 3                      |
| Objectives                | 3      | State specific objectives, including any pre-specified hypotheses                                                                                                                                                                                                                                                                                                                                                                                                      | 3                      |
| <b>Methods</b>            |        |                                                                                                                                                                                                                                                                                                                                                                                                                                                                        |                        |
| Study design              | 4      | Present key elements of study design early in the paper                                                                                                                                                                                                                                                                                                                                                                                                                | 4-5                    |
| Setting                   | 5      | Describe the setting, locations, and relevant dates, including periods of recruitment, exposure, follow-up, and data collection                                                                                                                                                                                                                                                                                                                                        | 4                      |
| Participants              | 6      | (a) <i>Cohort study</i> —Give the eligibility criteria, and the sources and methods of selection of participants. Describe methods of follow-up<br><i>Case-control study</i> —Give the eligibility criteria, and the sources and methods of case ascertainment and control selection. Give the rationale for the choice of cases and controls<br><i>Cross-sectional study</i> —Give the eligibility criteria, and the sources and methods of selection of participants | 4                      |
|                           |        | (b) <i>Cohort study</i> —For matched studies, give matching criteria and number of exposed and unexposed<br><i>Case-control study</i> —For matched studies, give matching criteria and the number of controls per case                                                                                                                                                                                                                                                 |                        |
| Variables                 | 7      | Clearly define all outcomes, exposures, predictors, potential confounders, and effect modifiers. Give diagnostic criteria, if applicable                                                                                                                                                                                                                                                                                                                               | 4-5                    |
| Data sources/ measurement | 8*     | For each variable of interest, give sources of data and details of methods of assessment (measurement). Describe comparability of assessment methods if there is more than one group                                                                                                                                                                                                                                                                                   | 4-5                    |
| Bias                      | 9      | Describe any efforts to address potential sources of bias                                                                                                                                                                                                                                                                                                                                                                                                              | Not applicable         |
| Study size                | 10     | Explain how the study size was arrived at                                                                                                                                                                                                                                                                                                                                                                                                                              | 4                      |
| Quantitative variables    | 11     | Explain how quantitative variables were handled in the analyses. If applicable, describe which groupings were chosen and why                                                                                                                                                                                                                                                                                                                                           | 5-6                    |
| Statistical methods       | 12     | (a) Describe all statistical methods, including those used to control for confounding                                                                                                                                                                                                                                                                                                                                                                                  | 5-6                    |
|                           |        | (b) Describe any methods used to examine subgroups and interactions                                                                                                                                                                                                                                                                                                                                                                                                    | Not applicable         |
|                           |        | (c) Explain how missing data were addressed                                                                                                                                                                                                                                                                                                                                                                                                                            | See tables and figures |
|                           |        | (d) <i>Cohort study</i> —If applicable, explain how loss to follow-up was addressed<br><i>Case-control study</i> —If applicable, explain how matching of cases and controls was addressed                                                                                                                                                                                                                                                                              | 6                      |

|                          |     |                                                                                                                                                                                                              |                |
|--------------------------|-----|--------------------------------------------------------------------------------------------------------------------------------------------------------------------------------------------------------------|----------------|
|                          |     | <i>Cross-sectional study</i> —If applicable, describe analytical methods taking account of sampling strategy                                                                                                 |                |
|                          |     | (e) Describe any sensitivity analyses                                                                                                                                                                        | Not applicable |
| <b>Results</b>           |     |                                                                                                                                                                                                              |                |
| Participants             | 13* | (a) Report numbers of individuals at each stage of study—eg numbers potentially eligible, examined for eligibility, confirmed eligible, included in the study, completing follow-up, and analysed            | 6              |
|                          |     | (b) Give reasons for non-participation at each stage                                                                                                                                                         | 6              |
|                          |     | (c) Consider use of a flow diagram                                                                                                                                                                           | 6              |
| Descriptive data         | 14* | (a) Give characteristics of study participants (eg demographic, clinical, social) and information on exposures and potential confounders                                                                     | 6              |
|                          |     | (b) Indicate number of participants with missing data for each variable of interest                                                                                                                          | 6              |
|                          |     | (c) <i>Cohort study</i> —Summarise follow-up time (eg, average and total amount)                                                                                                                             | 6              |
| Outcome data             | 15* | <i>Cohort study</i> —Report numbers of outcome events or summary measures over time                                                                                                                          | Not applicable |
|                          |     | <i>Case-control study</i> —Report numbers in each exposure category, or summary measures of exposure                                                                                                         | Not applicable |
|                          |     | <i>Cross-sectional study</i> —Report numbers of outcome events or summary measures                                                                                                                           | Not applicable |
| Main results             | 16  | (a) Give unadjusted estimates and, if applicable, confounder-adjusted estimates and their precision (eg, 95% confidence interval). Make clear which confounders were adjusted for and why they were included | 7              |
|                          |     | (b) Report category boundaries when continuous variables were categorized                                                                                                                                    | 7              |
|                          |     | (c) If relevant, consider translating estimates of relative risk into absolute risk for a meaningful time period                                                                                             | Not applicable |
| Other analyses           | 17  | Report other analyses done—eg analyses of subgroups and interactions, and sensitivity analyses                                                                                                               | Not applicable |
| <b>Discussion</b>        |     |                                                                                                                                                                                                              |                |
| Key results              | 18  | Summarise key results with reference to study objectives                                                                                                                                                     | 7-8            |
| Limitations              | 19  | Discuss limitations of the study, taking into account sources of potential bias or imprecision. Discuss both direction and magnitude of any potential bias                                                   | 9              |
| Interpretation           | 20  | Give a cautious overall interpretation of results considering objectives, limitations, multiplicity of analyses, results from similar studies, and other relevant evidence                                   | 8-9            |
| Generalisability         | 21  | Discuss the generalisability (external validity) of the study results                                                                                                                                        | 8-9            |
| <b>Other information</b> |     |                                                                                                                                                                                                              |                |
| Funding                  | 22  | Give the source of funding and the role of the funders for the present study and, if applicable, for the original study on which the present article is based                                                | 10             |

\*Give information separately for cases and controls in case-control studies and, if applicable, for exposed and unexposed groups in cohort and cross-sectional studies.

**Note:** An Explanation and Elaboration article discusses each checklist item and gives methodological background and published examples of transparent reporting. The STROBE checklist is best used in conjunction with this article (freely available on the Web sites of PLoS Medicine at <http://www.plosmedicine.org/>, Annals of Internal Medicine at <http://www.annals.org/>, and Epidemiology at <http://www.epidem.com/>). Information on the STROBE Initiative is available at [www.strobe-statement.org](http://www.strobe-statement.org).

# BMJ Open

## A one year longitudinal study of psychological distress and self-assessed health in survivors of out-of-hospital cardiac arrest.

|                                 |                                                                                                                                                                                                                                                                                                                                                                                                                                                                                                |
|---------------------------------|------------------------------------------------------------------------------------------------------------------------------------------------------------------------------------------------------------------------------------------------------------------------------------------------------------------------------------------------------------------------------------------------------------------------------------------------------------------------------------------------|
| Journal:                        | <i>BMJ Open</i>                                                                                                                                                                                                                                                                                                                                                                                                                                                                                |
| Manuscript ID                   | bmjopen-2019-029756.R1                                                                                                                                                                                                                                                                                                                                                                                                                                                                         |
| Article Type:                   | Research                                                                                                                                                                                                                                                                                                                                                                                                                                                                                       |
| Date Submitted by the Author:   | 17-Apr-2019                                                                                                                                                                                                                                                                                                                                                                                                                                                                                    |
| Complete List of Authors:       | Viktorisson, Adam; Goteborgs universitet Institutionen for neurovetenskap och fysiologi, Rehabilitation medicine Sunnerhagen, Katharina; Univ of Gothenburg, Inst of Neuroscience and Physiology<br>Johansson, Dongni; Goteborgs universitet Sahlgrenska Akademin, Department of Clinical Neuroscience at Institute of Neuroscience and Physiology<br>Herlitz, Johan; Faculty of Caring Science, Work Life and Social Welfare, University of Borås<br>Axelsson, Åsa; University of Gothenburg, |
| <b>Primary Subject Heading</b>: | Rehabilitation medicine                                                                                                                                                                                                                                                                                                                                                                                                                                                                        |
| Secondary Subject Heading:      | Cardiovascular medicine                                                                                                                                                                                                                                                                                                                                                                                                                                                                        |
| Keywords:                       | Cardiac arrest, Follow-up, Outcome, Anxiety, Depression, Quality of life                                                                                                                                                                                                                                                                                                                                                                                                                       |
|                                 |                                                                                                                                                                                                                                                                                                                                                                                                                                                                                                |

SCHOLARONE™  
Manuscripts

1  
2  
3 **Running headline:** A one year longitudinal study of psychological distress and self-assessed  
4 health in survivors of out-of-hospital cardiac arrest.  
5  
6  
7

8  
9 Adam Viktorisson<sup>1,\*</sup>, Katharina S Sunnerhagen<sup>1</sup>, Dongni Johansson<sup>1</sup>, Johan Herlitz<sup>2,3</sup>, Åsa B  
10 Axelsson<sup>4</sup>  
11  
12  
13  
14  
15

16 1. Institute of Neuroscience and Physiology, Rehabilitation Medicine, Sahlgrenska Academy,  
17 University of Gothenburg, Box 430, SE 405 30 Gothenburg, Sweden.

18 2. Institute of Internal Medicine, Department of Metabolism and Cardiovascular Research,  
19 Sahlgrenska University Hospital, SE 413 45 Gothenburg, Sweden.  
20  
21

22 3. Prehospiten Centre of Prehospital Research, Faculty of Caring Science, Work Life and  
23 Social Welfare, University of Borås, Sweden.  
24  
25

26 4. Institute of Health and Care Sciences, Sahlgrenska Academy, University of Gothenburg,  
27 Box 457, SE 405 30 Gothenburg, Sweden.  
28  
29  
30  
31  
32

33 \* Corresponding author: Adam Viktorisson

34 Sahlgrenska Academy,

35 Institute of Neuroscience and Physiology

36 Per Dubbsgatan 14, 3<sup>rd</sup> floor

37 PO Box 430

38 SE 405 30, Gothenburg

39 Sweden.  
40  
41  
42  
43  
44

45 E-mail address: [adam.viktorisson@gu.se](mailto:adam.viktorisson@gu.se)

46 Phone: +46-31-342 2803  
47  
48  
49  
50  
51

52 **Word count:** 2859  
53  
54  
55  
56  
57  
58  
59  
60

## Abstract

*Objectives:* Few studies have investigated the psychological and health-related outcome after out-of-hospital cardiac arrest (OHCA) over time. This longitudinal study aims to evaluate psychological distress in terms of anxiety and depression, self-assessed health, and predictors of these outcomes in survivors of OHCA, three and 12 months after resuscitation.

*Methods:* Recruitment took place from 2008 to 2011 and survivors of OHCA were identified through the national Swedish Cardiopulmonary Resuscitation Registry. Inclusion criteria were age  $\geq 18$  years, survival  $\geq 12$  months and a Cerebral Performance Category score  $\leq 2$ . Questionnaires containing the Hospital Anxiety and Depression scale (HADS) and European Quality of Life 5 Dimensions 3 Level (EQ-5D-3L) were administered at three and 12 months after the OHCA. Participants were also asked to report treatment-requiring comorbidities.

*Results:* Of 298 survivors, 85 were eligible for this study and 74 responded. Anxiety was reported by 22 survivors at three months and by 17 at 12 months, while depression was reported by 10 at three months and 4 at 12 months. The mean EQ-5D-3L index value increased from 0.82 ( $\pm 0.26$ ) to 0.88 ( $\pm 0.15$ ) over time. There were significantly less symptoms of psychological distress ( $p=0.01$ ) and better self-assessed health ( $p=0.003$ ) at 12-months. Treatment-requiring comorbidity predicted anxiety (OR 4.07,  $p=0.04$ ), while being female and young age predicted poor health (OR 6.33,  $p=0.04$ ; OR 0.91,  $p=0.002$ ) at three months. At 12 months, being female was linked to anxiety (OR 9.23,  $p=0.01$ ) and depression (OR 14.78,  $p=0.002$ ), while young age predicted poor health (OR 0.93,  $p=0.003$ ).

*Conclusion:* The level of psychological distress and self-assessed health improve among survivors of OHCA between three and 12 months after resuscitation. Higher levels of psychological distress can be expected among female survivors and those with comorbidity, while survivors of young age and who are female are at greater risk of poor health.

## Strengths and limitations of this study

- Data were collected from virtually every out-of-hospital cardiac arrest survivor within the course of 4 years in a large region of Sweden.
- A nurse responsible for data collection was placed at each hospital in the region to match survivors with data from the Swedish Cardiopulmonary Resuscitation Registry.
- Only survivors with a cerebral performance category score of  $\leq 2$  were included.

- The use of generic measures of health has a limited ability to capture the complexity of the health state in survivors of cardiac arrest.

**Key words:** Cardiac arrest; Follow-up; Outcome; Anxiety; Depression; Quality of life.

## Introduction

Out-of-hospital cardiac arrest (OHCA) is a deadly condition that affects approximately 5000 inhabitants in Sweden each year (1). The survival rate of OHCA is low, although great efforts have been made to raise the number of survivors in recent years; consequently, the 30-day survival rate in Sweden has increased from 4.5% in 1992 to 11.4% in 2017 (2). When the heart stops hypoxic brain injury occurs within minutes and is the most critical factor in determining the chance of survival and level of functioning, if resuscitation is successful (3). Following cerebral hypoxia, cardiac arrest survivors are known to be at risk of cognitive and emotional deficits (4-7). Although most survivors with a good neurological outcome return to high function and quality of life (8, 9), long-term psychological problems have been reported by up to one-third in Swedish-samples (10, 11). Furthermore, the ability to pinpoint survivors who need psychiatric rehabilitation will become more important as survival rates continue to increase.

There is already an extensive body of knowledge regarding the outcome after cardiac arrest in different patient populations and time points. Time to awakening, gender, age, role of bystander, use of hypothermia and percutaneous coronary intervention (PCI) have previously been related to the outcome after cardiac arrest (6, 12, 13). However, few studies have investigated the psychological and health-related outcome in the same sample over time (9, 10, 14), and little is known about factors associated with post cardiac arrest improvement in these aspects. The interpretation of the available literature is complicated by high heterogeneity in study outcomes, and knowledge regarding psychological distress and self-assessed health after OHCA in relation to the average population is lacking (7, 15).

We have previously reported that reduced well-being is experienced by half of OHCA survivors at three months, and that female survivors report significantly more anxiety and worse health compared to males (16). In this study, we will investigate how the psychological and health-related outcomes change in survivors of OHCA with good neurological functioning between three and 12 months after resuscitation. Further, we will also evaluate predictors of psychological distress and self-assessed poor health at these time points.

## Methods

### *Design and setting*

This was a longitudinal study with self-administered postal questionnaires sent to survivors three and 12 months after the OHCA. The setting was a region in Sweden with 1.6 million inhabitants and nine hospitals that treat cardiac arrest. The frequency of OHCA was 850 cases annually and the survival rate approximately 10%.

### *Study population*

The study population was identified through the national Swedish Cardiopulmonary Resuscitation Registry (SCRR). Every person who suffered from an OHCA and for whom resuscitation was initiated should be included in the SCRR. To ensure complete coverage, there was a specially-trained nurse at each hospital who could identify missing cases and match patients treated for OHCA with data from the SCRR.

Recruitment took place from 1st January 2008 to 31st December 2011 and every adult survivor of OHCA in the region was assessed for inclusion. The study inclusion criteria were age  $\geq 18$  years, survival  $\geq 12$  months, and a Cerebral Performance Category (CPC) score  $\leq 2$  at discharge, denoting good neurological functioning (17). Exclusion criteria were cardiac arrest due to trauma, attempted suicide, intoxication, or abuse. Survivors with other severe illness and survivors treated but not residing in the region were also excluded.

### *Procedure and questionnaire*

Eligible survivors received a postal questionnaire in Swedish three months after the OHCA. Survivors who responded to the questionnaires and gave a written consent were included. Participants at three months then received a second questionnaire at 12 months. A reminder was sent if no response was received after three weeks. The questionnaire consisted of the Hospital Anxiety and Depression scale (HADS) and European Quality of Life 5 Dimensions 3 Level (EQ-5D-3L). Study participants were also asked to report treatment-requiring comorbidity.

The HADS is a 14-item screening instrument developed to detect psychological distress in terms of clinically significant anxiety and/or depression (18). It is divided into two subscales, seven items regarding anxiety (HADS-anxiety) and seven items regarding symptoms of depression (HADS-depression). Each item has four levels, scored 0-3, with a maximum score of 21 in each subscale. Scoring  $>7$  in one subscale indicates mild to moderate problems and a score  $>10$  indicates severe problems. Although the HADS has never been thoroughly

1  
2  
3 evaluated in a cardiac arrest population, it is considered a reliable measurement for depression  
4 and anxiety in patients with somatic illness (19) and is frequently used in cardiovascular  
5 research (7).  
6  
7

8 EQ-5D-3L is designed to measure subjective health and includes the EQ-5D-3L descriptive  
9 system and a visual analogue scale (EQ VAS) (20). The descriptive system  
10 comprises five dimensions (mobility, self-care, usual activities, pain/discomfort and  
11 anxiety/depression); each dimension has three levels (no problems, moderate problems and  
12 severe problems) denoting a score of 1-3. The total score in the EQ-5D-3L descriptive system  
13 can be converted to an index-value which ranges between  $-0.594$  and  $1.00$ , calculated with  
14 the UK EQ-5D index tariff (21). An index value of  $1.00$  indicates full health, while negative  
15 values represents health states worse than death (20). EQ VAS is visualized as a continuum  
16 of value scale where the patient assesses his or her current health on a scale from zero to 100,  
17 with endpoints labelled 'best imaginable health state' and 'worst imaginable health state'.  
18 EQ-5D-3L is commonly used in cardiovascular research (22). However, the use of EQ-5D-3L  
19 in OHCA populations has been questioned as the instrument has shown a limited ability to  
20 differentiate between survivors of good health (23).  
21  
22  
23  
24  
25  
26  
27  
28  
29  
30  
31

### 32 *Statistics and data analysis*

34 Statistical analyses were executed with IBM SPSS Statistics 24.0 (Armonk, NY: IBM Corp).  
35 All p-values were two-sided and interpreted at a 0.05 significance level. Nonparametric tests  
36 were used for all comparisons as all dependent variables were non-normally distributed. The  
37  $\chi^2$  test was applied for nominal values and the Mann-Whitney U-test for ordinal values.  
38 Wilcoxon signed ranks test was used to explore the change between three and 12 months.  
39 Predictors of psychological distress (HADS) and self-assessed poor health (EQ-5D-3L index  
40 values) were investigated using multivariate binary logistic regression models. The outcome  
41 was dichotomised as good or bad with regard to the mean scores in two Swedish reference  
42 populations, matched to gender and age-group. A bad outcome was considered a score two  
43 standard deviations below the mean of the reference population. Reference values regarding  
44 the HADS were drawn from a random sample gathered 1997 in Jämtland County, Sweden  
45 (n=624) (24); similarly, reference values regarding the EQ-5D-3L index values were drawn  
46 from a random sample gathered 2001 in Stockholm County, Sweden (n=3069) (25). The  
47 predictors were included based on clinical reasoning and are presented in Table 1. With  
48 regard to the sample size, only six variables were evaluated and correlations between them  
49 were examined using Spearman's rank correlation; only variables with a Spearman's rho  $\pm$   
50  
51  
52  
53  
54  
55  
56  
57  
58  
59  
60



1  
2  
3  $\leq 0.7$  were accepted. Univariate analysis was conducted separately between each individual  
4 predictor. The significant level of the univariate analysis was 0.25 and predictors with a p-  
5 value  $> 0.25$  were excluded from further analysis. Hosmer and Lemeshow tests and Receiver  
6 Operating Characteristics curves (ROC-curves) were performed to ensure the reliability of the  
7 logistic regression models.  
8  
9

### 10 11 12 13 *Patient and public involvement*

14 None of the included patients were involved in the design or conduction of this study and no  
15 patient opinion regarding the subject has been obtained. The results will be reported to the  
16 Health & Medical Care Committee of the Regional Executive Board, Region Västra  
17  
18  
19  
20  
21  
22  
23  
24  
25  
26  
27  
28  
29  
30  
31  
32  
33  
34  
35  
36  
37  
38  
39  
40  
41  
42  
43  
44  
45  
46  
47  
48  
49  
50  
51  
52  
53  
54  
55  
56  
57  
58  
59  
60  
Göteborg, Sweden.

### *Ethics*

Ethical permission was granted by the Regional Ethics Review board, Western Sweden (No.  
465-07). Written consent was obtained from all participants.

### **Results**

There were 3082 cases of OHCA in the region during the study period, of which 298 were  
alive at 30 days. One-hundred-fifty survivors fulfilled the inclusion criteria for a three-month  
follow-up and 94 responded. Of the respondents at three months, 85 were included at 12  
months and 74 responded again (87% response rate); in the group that did not receive a  
second questionnaire, five had died and four were lost due to logistical errors (Figure 1).

The representativeness of the study population has been investigated in a prior study (26),  
and there were no significant differences regarding age, gender, cardiac arrest circumstances,  
or in-hospital interventions between respondents and non-respondents. However, there were  
differences between participants and the survivors that only responded once. Double  
respondents were significantly younger ( $Z=2.316$ ,  $p=0.021$ ), had a lower frequency of cardiac  
arrest at home ( $\chi^2=6.249$ ,  $p=0.014$ ), and a higher frequency of ventricular fibrillation or  
ventricular tachycardia as initial rhythm ( $\chi^2=5.067$ ,  $p=0.032$ ). Background characteristics and  
self-reported comorbidity of the participants are presented in Table 1.

Mild to moderate anxiety ( $>7$  in HADS-A) was reported by 22 survivors at the three months  
follow-up and by 17 at 12 months. Mild to moderate depression ( $>7$  in HADS-D) was  
reported by 10 survivors at three months and by four at 12 months. A score indicating severe  
anxiety ( $>10$  in HADS-A) was reported by 12 survivors at three months and by eight at 12

1  
2  
3 months, while severe depression ( $>10$  in HADS-D) was reported by three at three months and  
4 one at 12 months. Overall, survivors of OHCA reported a significantly improved  
5 psychological and health-related outcome over time (Table 2). About half of the survivors  
6 reported less psychological distress in the HADS at 12 months (51% decrease in anxiety and  
7 46% in symptoms of depression); although one-third reported an increase in psychological  
8 distress (30% increase in anxiety and 28% in symptoms of depression). Two-thirds of female  
9 survivors reported more psychological distress at the 12-month follow up, corresponding to  
10 one-fifth among male survivors. Comparably, half of the survivors reported better self-  
11 assessed health at 12 months in EQ-5D-3L, whereas 41% reported the same health state at  
12 three and 12 months. Among the survivors who remained unchanged, 73% reported an EQ-  
13 5D-3L index value of 1.00, denoting full health at both time points. However, only one  
14 survivor entered full health at both times in EQ VAS (Figure 2).

15  
16 Binary logistic regression analyses were performed to find predictors of psychological  
17 distress and self-assessed poor health (Table 3). The presence of treatment-requiring  
18 comorbidity was found to predict more anxiety at three months after resuscitation (OR 4.07,  
19  $p=0.04$ ), but there was no significant odds ratio regarding comorbidity at 12 months; instead,  
20 being female was found to predict more anxiety (OR 9.23,  $p=0.01$ ) and more symptoms of  
21 depression (OR 14.78,  $p=0.002$ ) at this time. Being female was also found to predict self-  
22 assessed poor health at three months (OR 6.33,  $p=0.04$ ), while young age was found to predict  
23 poor health at three and 12 months, respectively (OR 0.91,  $p=0.002$ ; OR 0.93,  $p=0.003$ ).

## 39 Discussion

40  
41 One objective of this study was to investigate how the psychological and health-related  
42 outcomes change between three and 12 months in survivors of OHCA with good neurological  
43 functioning. We found an encouraging progression as survivors at large showed less  
44 psychological distress and better self-assessed health over time. In comparison, participants in  
45 this study even surpassed the average level of depression and self-assessed health in the  
46 Swedish population at their 12-month follow-up (24, 25). However, we also found that even  
47 though about half of OHCA survivors report a decrease in psychological distress between  
48 three and 12 months, almost one-third report increased psychological distress; hence, our  
49 results indicate that the psychological outcome after OHCA may differ considerably on an  
50 individual level.

51  
52 As stated earlier, few prior longitudinal studies have investigated the psychological and  
53 health-related outcomes after cardiac arrest. In accordance with our results, two small sample  
54  
55  
56  
57  
58  
59  
60

1  
2  
3 studies have previously reported a decrease of anxiety and depressive symptoms in cardiac  
4 arrest survivors over time (13, 27). In contrast, a rather large prospective study found no  
5 change in anxiety or depressive symptoms between one and 12 months (14). It is possible that  
6 the heterogeneity in psychological outcomes observed in this study could explain a part of the  
7 discrepancies in the available literature. As regards self-assessed health, the improvements  
8 seen in this study confirm the results of two previous longitudinal studies (9, 10). However,  
9 these previous studies found that the greatest health-related improvements occurred in the  
10 early stages of recovery, within three months after cardiac arrest (9, 10). Moreover, although  
11 the 'minimal clinically important difference' in the HADS and EQ-5D-3L among survivors of  
12 cardiac arrest is unknown, estimates from other patient populations indicate that the  
13 improvements seen in this study might not be clinically noticeable (28, 29).

14  
15  
16  
17  
18  
19  
20  
21  
22 A second objective was to evaluate predictors of psychological distress self-assessed poor  
23 health after OHCA. Since it is already known that cardiac arrest survivors generally report  
24 few psychological problems and good health, it is difficult to define a threshold for a bad  
25 outcome among those who perform well neurologically. In this study, the outcome was  
26 dichotomised as good or bad in comparison to mean scores from the average Swedish  
27 population. Prior studies have concluded that many survivors reach an psychological state and  
28 health comparable to the average population, although no study has previously investigated  
29 predictors of this outcome (9, 10, 30). In addition, there is also a lack of knowledge regarding  
30 factors associated with post cardiac arrest improvement over time (13, 31). We found that  
31 comorbidity is associated with higher levels of anxiety compared to the average population at  
32 three months after OHCA. However, we did not find a significant correlation between  
33 comorbidity and anxiety or depression at the 12-month follow-up. In contrast, being female  
34 was strongly associated with psychological distress at one year after resuscitation, but this  
35 was not significant at three months. We also found a significant correlation between being  
36 female and self-assessed poor health at three months, while young age was associated with  
37 self-assessed poor health at both three and 12 months.

38  
39  
40  
41  
42  
43  
44  
45  
46  
47  
48  
49  
50  
51  
52  
53  
54  
55  
56  
57  
58  
59  
60  
61  
62  
63  
64  
65  
66  
67  
68  
69  
70  
71  
72  
73  
74  
75  
76  
77  
78  
79  
80  
81  
82  
83  
84  
85  
86  
87  
88  
89  
90  
91  
92  
93  
94  
95  
96  
97  
98  
99  
100  
101  
102  
103  
104  
105  
106  
107  
108  
109  
110  
111  
112  
113  
114  
115  
116  
117  
118  
119  
120  
121  
122  
123  
124  
125  
126  
127  
128  
129  
130  
131  
132  
133  
134  
135  
136  
137  
138  
139  
140  
141  
142  
143  
144  
145  
146  
147  
148  
149  
150  
151  
152  
153  
154  
155  
156  
157  
158  
159  
160  
161  
162  
163  
164  
165  
166  
167  
168  
169  
170  
171  
172  
173  
174  
175  
176  
177  
178  
179  
180  
181  
182  
183  
184  
185  
186  
187  
188  
189  
190  
191  
192  
193  
194  
195  
196  
197  
198  
199  
200  
201  
202  
203  
204  
205  
206  
207  
208  
209  
210  
211  
212  
213  
214  
215  
216  
217  
218  
219  
220  
221  
222  
223  
224  
225  
226  
227  
228  
229  
230  
231  
232  
233  
234  
235  
236  
237  
238  
239  
240  
241  
242  
243  
244  
245  
246  
247  
248  
249  
250  
251  
252  
253  
254  
255  
256  
257  
258  
259  
260  
261  
262  
263  
264  
265  
266  
267  
268  
269  
270  
271  
272  
273  
274  
275  
276  
277  
278  
279  
280  
281  
282  
283  
284  
285  
286  
287  
288  
289  
290  
291  
292  
293  
294  
295  
296  
297  
298  
299  
300  
301  
302  
303  
304  
305  
306  
307  
308  
309  
310  
311  
312  
313  
314  
315  
316  
317  
318  
319  
320  
321  
322  
323  
324  
325  
326  
327  
328  
329  
330  
331  
332  
333  
334  
335  
336  
337  
338  
339  
340  
341  
342  
343  
344  
345  
346  
347  
348  
349  
350  
351  
352  
353  
354  
355  
356  
357  
358  
359  
360  
361  
362  
363  
364  
365  
366  
367  
368  
369  
370  
371  
372  
373  
374  
375  
376  
377  
378  
379  
380  
381  
382  
383  
384  
385  
386  
387  
388  
389  
390  
391  
392  
393  
394  
395  
396  
397  
398  
399  
400  
401  
402  
403  
404  
405  
406  
407  
408  
409  
410  
411  
412  
413  
414  
415  
416  
417  
418  
419  
420  
421  
422  
423  
424  
425  
426  
427  
428  
429  
430  
431  
432  
433  
434  
435  
436  
437  
438  
439  
440  
441  
442  
443  
444  
445  
446  
447  
448  
449  
450  
451  
452  
453  
454  
455  
456  
457  
458  
459  
460  
461  
462  
463  
464  
465  
466  
467  
468  
469  
470  
471  
472  
473  
474  
475  
476  
477  
478  
479  
480  
481  
482  
483  
484  
485  
486  
487  
488  
489  
490  
491  
492  
493  
494  
495  
496  
497  
498  
499  
500  
501  
502  
503  
504  
505  
506  
507  
508  
509  
510  
511  
512  
513  
514  
515  
516  
517  
518  
519  
520  
521  
522  
523  
524  
525  
526  
527  
528  
529  
530  
531  
532  
533  
534  
535  
536  
537  
538  
539  
540  
541  
542  
543  
544  
545  
546  
547  
548  
549  
550  
551  
552  
553  
554  
555  
556  
557  
558  
559  
560  
561  
562  
563  
564  
565  
566  
567  
568  
569  
570  
571  
572  
573  
574  
575  
576  
577  
578  
579  
580  
581  
582  
583  
584  
585  
586  
587  
588  
589  
590  
591  
592  
593  
594  
595  
596  
597  
598  
599  
600  
601  
602  
603  
604  
605  
606  
607  
608  
609  
610  
611  
612  
613  
614  
615  
616  
617  
618  
619  
620  
621  
622  
623  
624  
625  
626  
627  
628  
629  
630  
631  
632  
633  
634  
635  
636  
637  
638  
639  
640  
641  
642  
643  
644  
645  
646  
647  
648  
649  
650  
651  
652  
653  
654  
655  
656  
657  
658  
659  
660  
661  
662  
663  
664  
665  
666  
667  
668  
669  
670  
671  
672  
673  
674  
675  
676  
677  
678  
679  
680  
681  
682  
683  
684  
685  
686  
687  
688  
689  
690  
691  
692  
693  
694  
695  
696  
697  
698  
699  
700  
701  
702  
703  
704  
705  
706  
707  
708  
709  
710  
711  
712  
713  
714  
715  
716  
717  
718  
719  
720  
721  
722  
723  
724  
725  
726  
727  
728  
729  
730  
731  
732  
733  
734  
735  
736  
737  
738  
739  
740  
741  
742  
743  
744  
745  
746  
747  
748  
749  
750  
751  
752  
753  
754  
755  
756  
757  
758  
759  
760  
761  
762  
763  
764  
765  
766  
767  
768  
769  
770  
771  
772  
773  
774  
775  
776  
777  
778  
779  
780  
781  
782  
783  
784  
785  
786  
787  
788  
789  
790  
791  
792  
793  
794  
795  
796  
797  
798  
799  
800  
801  
802  
803  
804  
805  
806  
807  
808  
809  
810  
811  
812  
813  
814  
815  
816  
817  
818  
819  
820  
821  
822  
823  
824  
825  
826  
827  
828  
829  
830  
831  
832  
833  
834  
835  
836  
837  
838  
839  
840  
841  
842  
843  
844  
845  
846  
847  
848  
849  
850  
851  
852  
853  
854  
855  
856  
857  
858  
859  
860  
861  
862  
863  
864  
865  
866  
867  
868  
869  
870  
871  
872  
873  
874  
875  
876  
877  
878  
879  
880  
881  
882  
883  
884  
885  
886  
887  
888  
889  
890  
891  
892  
893  
894  
895  
896  
897  
898  
899  
900  
901  
902  
903  
904  
905  
906  
907  
908  
909  
910  
911  
912  
913  
914  
915  
916  
917  
918  
919  
920  
921  
922  
923  
924  
925  
926  
927  
928  
929  
930  
931  
932  
933  
934  
935  
936  
937  
938  
939  
940  
941  
942  
943  
944  
945  
946  
947  
948  
949  
950  
951  
952  
953  
954  
955  
956  
957  
958  
959  
960  
961  
962  
963  
964  
965  
966  
967  
968  
969  
970  
971  
972  
973  
974  
975  
976  
977  
978  
979  
980  
981  
982  
983  
984  
985  
986  
987  
988  
989  
990  
991  
992  
993  
994  
995  
996  
997  
998  
999  
1000

Studies investigating prognostic factors regarding the psychological or health-related outcomes after cardiac arrest are scarce. However, receiving an ICD has been linked to higher levels of psychological distress (32), but this effect has not been shown in a cardiac arrest population (14). We did not find any significant correlation regarding ICD in our regression models either. Young age and being female have previously been associated with anxiety among cardiac arrest survivors (30), but there were no significant correlation between psychological distress and age in our study population. Nevertheless, we did find a

1  
2  
3 considerably higher likelihood of depression among female survivors of OHCA at 12 months,  
4 which has not previously been reported. Also novel is the likelihood of a better self-assessed  
5 health among survivors of higher age.  
6  
7

8 The European Resuscitation Council has provided guidelines for post cardiac arrest  
9 rehabilitation since 2015 and has pointed out the need of a structured follow-up care,  
10 including physical, neurological, and emotional screening (33). Still, far from all cardiac  
11 arrest survivors in Sweden are offered rehabilitation or neuropsychological evaluation, despite  
12 recommendations from the Swedish Resuscitation Council (34, 35). Instead, survivors in  
13 Sweden are often followed based on the aetiology of the cardiac arrest with little to no focus  
14 on emotional sequelae (35, 36). Our results indicate that even if the majority of OHCA  
15 survivors live without psychological distress and with good self-assessed health, there are  
16 individuals that experience major problems. Consequently, it should be expected that some  
17 survivors will benefit from psychiatric rehabilitation, and survivors of young age, who are  
18 female, and those with treatment-requiring comorbidity should be screened early on.  
19  
20  
21  
22  
23  
24  
25  
26  
27  
28

### 29 *Strengths and limitations*

30 This study has several strengths. During the study period of four years, a specially-trained  
31 nurse was placed at every hospital in a large region of Sweden. With this approach, we were  
32 able to collect data from virtually every case of OHCA. The study design also allowed us to  
33 match non-respondents with data collected from the SCRR at the time of their hospitalisation,  
34 thus enabling comparisons between respondents and non-respondents. Consequently, we were  
35 able to confirm that the study population represents the group at large in these aspects.  
36  
37  
38  
39

40 Another strength is that the outcomes in this study could be compared with the average  
41 Swedish population. Knowledge regarding factors of importance for a psychological state and  
42 self-assessed health in line with the normal population after OHCA in Sweden is missing.  
43 This information will help to generalise the overall picture of OHCA survival and provide  
44 guidance regarding which survivors who need psychiatric rehabilitation. Furthermore, the  
45 response rate was very high at 12 months.  
46  
47  
48  
49

50 The main limitations of this study are the retrospective design and the restrictive inclusion  
51 of survivors with good neurological functioning (CPC-score  $\leq 2$ ), which limits the  
52 applicability on OHCA survivors more broadly. However, we made the assessment that  
53 inclusion of survivors with a severe cerebral dysfunction would complicate the interpretability  
54 of the results. Furthermore, it is not possible to differentiate between patients with a CPC-  
55 score of one and two. However, as mentioned above, we lack knowledge of the minimal  
56  
57  
58  
59  
60

1  
2  
3 clinically important difference regarding the HADS and EQ-5D-3L in this population. The  
4 strict inclusion is also reflected by the relatively small sample size which further limits the  
5 generalisability of the results. Another methodical limitation in this study is the use of EQ-  
6 5D-3L to measure self-assessed health. A recent study concluded that EQ-5D-3L might  
7 underestimate the health in OHCA survivors, yielding high ceiling effects, which was  
8 apparent in the EQ-5D-3L descriptive system in this study as well (23). Although EQ VAS  
9 showed higher interpretability with a more varied outcome in our study population, it is  
10 known that generic measures of health often fail to capture the true complexity of the health  
11 state in survivors of cardiac arrest (37). Finally, some survivors were excluded due to severe  
12 illness and a few non-respondents mentioned poor health as the reason for not participating.  
13 Therefore, it is possible that the participants in this study had a better outcome than survivors  
14 more generally.  
15  
16  
17  
18  
19  
20  
21  
22  
23

## 24 25 **Conclusions**

26  
27 On a group level, there is a significant improvement in the psychological and health-related  
28 outcomes among survivors of OHCA between three and 12 months after resuscitation. Higher  
29 levels of psychological distress can be expected among female survivors and those with  
30 treatment-requiring comorbidity, while young and female survivors are at risk of a self-  
31 assessed poor health. These findings should be considered in the follow-up after OHCA,  
32 although future research is required to identify further predictors regarding the long-term  
33 outcome and chance of improvement post cardiac arrest.  
34  
35  
36  
37  
38  
39  
40

## 41 **Funding**

42 Funding was provided as a grant from the Health & Medical Care Committee of the Regional  
43 Executive Board (VGFOUREG-78031), Region Västra Götaland, Sweden. The guarantor had  
44 no role in the design or execution of this study.  
45  
46  
47  
48  
49

## 50 **Acknowledgements**

51 We would like to thank the dedicated nurses who contributed to our collection of data. We  
52 would also like to thank Dr. Kate Bramley-Moore for English language editing assistance.  
53  
54  
55

## 56 **Competing interests**

57 The authors declare no conflict of interest.  
58  
59  
60

### Contributors

All authors have made a substantial contribution to the conception and design of the study. AV analysed the data and wrote the manuscript with input from all authors. KSS and ÅA initiated and planned the study, collected the data, assisted in the interpretation of the data and took part in drafting the manuscript. JH took part in the planning of the study, contributed with external expertise and have continuously revised the manuscript. DJ helped analyze the data and have continuously revised the manuscript.

### Data sharing statement

Due to ethical restrictions, data are available on request. Interested researchers may submit a request for data to the authors (adam.viktorisson@gu.se). According to Swedish regulation: <http://www.epn.se/en/start/regulations/>, the permission to use data is only for what has been applied for and then approved by the Ethical board. To not follow the regulations is seen as scientific misconduct.

## References

1. Stromsoe A, Svensson L, Axelsson AB, Claesson A, Goransson KE, Nordberg P, et al. Improved outcome in Sweden after out-of-hospital cardiac arrest and possible association with improvements in every link in the chain of survival. *European heart journal*. 2015;36(14):863-71.
2. Herlitz J. The Swedish national registry for cardiopulmonary resuscitation - Annual report 2017. Gothenburg; 2017.
3. Nolan JP, Neumar RW, Adrie C, Aibiki M, Berg RA, Bottiger BW, et al. Post-cardiac arrest syndrome: epidemiology, pathophysiology, treatment, and prognostication. A Scientific Statement from the International Liaison Committee on Resuscitation; the American Heart Association Emergency Cardiovascular Care Committee; the Council on Cardiovascular Surgery and Anesthesia; the Council on Cardiopulmonary, Perioperative, and Critical Care; the Council on Clinical Cardiology; the Council on Stroke. *Resuscitation*. 2008;79(3):350-79.
4. Lilja G, Nielsen N, Bro-Jeppesen J, Dunford H, Friberg H, Hofgren C, et al. Return to Work and Participation in Society After Out-of-Hospital Cardiac Arrest. *Circulation Cardiovascular quality and outcomes*. 2018;11(1):e003566.
5. Moulart VR, Verbunt JA, van Heugten CM, Wade DT. Cognitive impairments in survivors of out-of-hospital cardiac arrest: a systematic review. *Resuscitation*. 2009;80(3):297-305.
6. Wachelder EM, Moulart VR, van Heugten C, Verbunt JA, Bekkers SC, Wade DT. Life after survival: long-term daily functioning and quality of life after an out-of-hospital cardiac arrest. *Resuscitation*. 2009;80(5):517-22.
7. Wilder Schaaf KP, Artman LK, Peberdy MA, Walker WC, Ornato JP, Gossip MR, et al. Anxiety, depression, and PTSD following cardiac arrest: a systematic review of the literature. *Resuscitation*. 2013;84(7):873-7.
8. Green CR, Botha JA, Tiruvoipati R. Cognitive function, quality of life and mental health in survivors of our-of-hospital cardiac arrest: a review. *Anaesthesia and intensive care*. 2015;43(5):568-76.
9. Moulart VRM, van Heugten CM, Gorgels TPM, Wade DT, Verbunt JA. Long-term Outcome After Survival of a Cardiac Arrest: A Prospective Longitudinal Cohort Study. *Neurorehabilitation and neural repair*. 2017;31(6):530-9.
10. Lundgren-Nilsson A, Rosen H, Hofgren C, Sunnerhagen KS. The first year after successful cardiac resuscitation: function, activity, participation and quality of life. *Resuscitation*. 2005;66(3):285-9.
11. Sunnerhagen KS, Johansson O, Herlitz J, Grimby G. Life after cardiac arrest; a retrospective study. *Resuscitation*. 1996;31(2):135-40.
12. Akahane M, Tanabe S, Koike S, Ogawa T, Horiguchi H, Yasunaga H, et al. Elderly out-of-hospital cardiac arrest has worse outcomes with a family bystander than a non-family bystander. *International journal of emergency medicine*. 2012;5(1):41.
13. Sauve MJ, Doolittle N, Walker JA, Paul SM, Scheinman MM. Factors associated with cognitive recovery after cardiopulmonary resuscitation. *American journal of critical care : an official publication, American Association of Critical-Care Nurses*. 1996;5(2):127-39.
14. Kamphuis HC, De Leeuw JR, Derksen R, Hauer R, Winnubst JA. A 12-month quality of life assessment of cardiac arrest survivors treated with or without an implantable cardioverter defibrillator. *Europace : European pacing, arrhythmias, and cardiac electrophysiology : journal of the working groups on cardiac pacing, arrhythmias, and cardiac cellular electrophysiology of the European Society of Cardiology*. 2002;4(4):417-25.

15. Whitehead L, Perkins GD, Clarey A, Haywood KL. A systematic review of the outcomes reported in cardiac arrest clinical trials: the need for a core outcome set. *Resuscitation*. 2015;88:150-7.
16. Viktorisson A, Sunnerhagen KS, Poder U, Herlitz J, Axelsson AB. Well-being among survivors of out-of-hospital cardiac arrest: a cross-sectional retrospective study in Sweden. *BMJ open*. 2018;8(6):e021729.
17. Jennett B, Bond M. Assessment of outcome after severe brain damage. *Lancet (London, England)*. 1975;1(7905):480-4.
18. Zigmond AS, Snaith RP. The hospital anxiety and depression scale. *Acta psychiatrica Scandinavica*. 1983;67(6):361-70.
19. Bjelland I, Dahl AA, Haug TT, Neckelmann D. The validity of the Hospital Anxiety and Depression Scale. An updated literature review. *Journal of psychosomatic research*. 2002;52(2):69-77.
20. The EuroQol Group. EuroQol--a new facility for the measurement of health-related quality of life. *Health policy (Amsterdam, Netherlands)*. 1990;16(3):199-208.
21. Sullivan PW, Slejko JF, Sculpher MJ, Ghushchyan V. Catalogue of EQ-5D scores for the United Kingdom. *Medical decision making : an international journal of the Society for Medical Decision Making*. 2011;31(6):800-4.
22. Dyer MT, Goldsmith KA, Sharples LS, Buxton MJ. A review of health utilities using the EQ-5D in studies of cardiovascular disease. *Health and quality of life outcomes*. 2010;8:13.
23. Andrew E, Nehme Z, Bernard S, Smith K. Comparison of health-related quality of life and functional recovery measurement tools in out-of-hospital cardiac arrest survivors. *Resuscitation*. 2016;107:57-64.
24. Lisspers J, Nygren A, Soderman E. Hospital Anxiety and Depression Scale (HAD): some psychometric data for a Swedish sample. *Acta psychiatrica Scandinavica*. 1997;96(4):281-6.
25. Burstrom K, Johannesson M, Diderichsen F. Swedish population health-related quality of life results using the EQ-5D. *Quality of life research : an international journal of quality of life aspects of treatment, care and rehabilitation*. 2001;10(7):621-35.
26. Axelsson AB, Sunnerhagen KS, Herlitz J. Representativity and co-morbidity: Two factors of importance when reporting health status among survivors of cardiac arrest. *Resuscitation*. 2016;101:44-9.
27. Dougherty CM. Longitudinal recovery following sudden cardiac arrest and internal cardioverter defibrillator implantation: survivors and their families. *American journal of critical care : an official publication, American Association of Critical-Care Nurses*. 1994;3(2):145-54.
28. Pickard AS, Neary MP, Cella D. Estimation of minimally important differences in EQ-5D utility and VAS scores in cancer. *Health and quality of life outcomes*. 2007;5:70.
29. Puhan MA, Frey M, Buchi S, Schunemann HJ. The minimal important difference of the hospital anxiety and depression scale in patients with chronic obstructive pulmonary disease. *Health and quality of life outcomes*. 2008;6:46.
30. Lilja G, Nilsson G, Nielsen N, Friberg H, Hassager C, Koopmans M, et al. Anxiety and depression among out-of-hospital cardiac arrest survivors. *Resuscitation*. 2015;97:68-75.
31. Verberne D, Moolaert V, Verbunt J, van Heugten C. Factors predicting quality of life and societal participation after survival of a cardiac arrest: A prognostic longitudinal cohort study. *Resuscitation*. 2018;123:51-7.



- 1  
2  
3 32. Magyar-Russell G, Thombs BD, Cai JX, Baveja T, Kuhl EA, Singh PP, et al.  
4 The prevalence of anxiety and depression in adults with implantable cardioverter  
5 defibrillators: a systematic review. *Journal of psychosomatic research*. 2011;71(4):223-31.  
6  
7 33. Nolan JP, Soar J, Cariou A, Cronberg T, Moulaert VR, Deakin CD, et al.  
8 European Resuscitation Council and European Society of Intensive Care Medicine Guidelines  
9 for Post-resuscitation Care 2015: Section 5 of the European Resuscitation Council Guidelines  
10 for Resuscitation 2015. *Resuscitation*. 2015;95:202-22.  
11 34. Swedish Resuscitation Council - Post Cardiac Arrest Consult Team. Swedish  
12 guidelines for follow-up after cardiac arrest. 2016.  
13 35. Israelsson J, Lilja G, Bremer A, Stevenson-Agren J, Arestedt K. Post cardiac  
14 arrest care and follow-up in Sweden - a national web-survey. *BMC nursing*. 2016;15:1.  
15 36. Egerod I, Risom SS, Thomsen T, Storli SL, Eskerud RS, Holme AN, et al. ICU-  
16 recovery in Scandinavia: a comparative study of intensive care follow-up in Denmark,  
17 Norway and Sweden. *Intensive & critical care nursing*. 2013;29(2):103-11.  
18 37. Haywood K, Whitehead L, Nadkarni VM, Achana F, Beesems S, Bottiger BW,  
19 et al. COSCA (Core Outcome Set for Cardiac Arrest) in Adults: An Advisory Statement From  
20 the International Liaison Committee on Resuscitation. *Circulation*. 2018;137(22):e783-e801.  
21  
22  
23  
24  
25  
26  
27  
28  
29  
30  
31  
32  
33  
34  
35  
36  
37  
38  
39  
40  
41  
42  
43  
44  
45  
46  
47  
48  
49  
50  
51  
52  
53  
54  
55  
56  
57  
58  
59  
60

1  
2  
3 **Figure legends**  
4  
5

6 **Figure 1.** Flowchart of study participants.  
7  
8  
9

10 **Figure 2.** Scatter plot with individual reported outcomes in the HADS and EQ-5D-3L at three  
11 months (x-axis) and 12 months (y-axis). Dots above the diagonal lines indicate a higher score  
12 at the 12-month follow-up. Scores from 7 participants are missing in EQ VAS.  
13  
14  
15  
16  
17  
18  
19  
20  
21  
22  
23  
24  
25  
26  
27  
28  
29  
30  
31  
32  
33  
34  
35  
36  
37  
38  
39  
40  
41  
42  
43  
44  
45  
46  
47  
48  
49  
50  
51  
52  
53  
54  
55  
56  
57  
58  
59  
60

**Table 1.** Background characteristics and self-reported comorbidity of participants.

| <i>n (%) unless otherwise stated</i>     | <b>Participants</b><br>n=74 | <b>Missing</b><br><b>data*</b> |
|------------------------------------------|-----------------------------|--------------------------------|
| Age. Median (min-max) <sup>a</sup>       | 63 (25-89)                  |                                |
| Female <sup>a</sup>                      | 13 (18)                     |                                |
| Time to EMS in minutes. Median (min-max) | 7 (1-61)                    | 11                             |
| <b>Cardiac arrest circumstances</b>      |                             |                                |
| Cardiac aetiology <sup>a</sup>           | 62 (86)                     | 2                              |
| Cardiac arrest at home                   | 22 (30)                     |                                |
| CPR before arrival of EMS                | 41 (55)                     |                                |
| Initial rhythm: VF or VT                 | 61 (86)                     | 3                              |
| Witnessed cardiac arrest                 | 69 (95)                     | 1                              |
| <b>In-hospital interventions</b>         |                             |                                |
| CABG                                     | 5 (7)                       | 2                              |
| ICD <sup>a</sup>                         | 19 (27)                     | 4                              |
| Induced hypothermia (33°C) <sup>a</sup>  | 35 (49)                     | 2                              |
| PCI                                      | 39 (54)                     | 2                              |
| <b>Comorbidity**<sup>a</sup></b>         |                             |                                |
| Anaemia or other blood disease           | 0                           |                                |
| Back pain                                | 3 (4)                       |                                |
| Cancer                                   | 1 (1)                       |                                |
| Diabetes mellitus                        | 2 (3)                       |                                |
| Gastrointestinal disease                 | 5 (7)                       |                                |
| Heart disease                            | 54 (73)                     |                                |
| Hypertension                             | 27 (36)                     |                                |

|    |                      |       |
|----|----------------------|-------|
| 1  |                      |       |
| 2  |                      |       |
| 3  | Liver disease        | 1 (1) |
| 4  |                      |       |
| 5  | Osteoarthritis       | 2 (3) |
| 6  |                      |       |
| 7  | Pulmonary disease    | 3 (4) |
| 8  |                      |       |
| 9  | Renal disease        | 0     |
| 10 |                      |       |
| 11 | Rheumatoid arthritis | 1 (1) |
| 12 |                      |       |
| 13 | <hr/>                |       |

14 \* Number of participants where information is missing

15 \*\* Number of participants with self-reported treatment-requiring comorbidity

16  
17 <sup>a</sup> Variables included as predictors in the univariate regression analyses

18  
19  
20 Abbreviations: VF, ventricular fibrillation; VT ventricular tachycardia; CRP,  
21 cardiopulmonary resuscitation; EMS, emergency medical service; PCI,  
22 percutaneous coronary intervention; CABG, coronary artery bypass grafting; ICD,  
23 implantable cardioverter defibrillator  
24  
25  
26  
27  
28  
29  
30  
31  
32  
33  
34  
35  
36  
37  
38  
39  
40  
41  
42  
43  
44  
45  
46  
47  
48  
49  
50  
51  
52  
53  
54  
55  
56  
57  
58  
59  
60

**Table 2.** Comparison of mean scores at three and 12 months in the HADS and EQ-5D-3L (n=74).

|                 | <b>3 months</b>    | <b>12 months</b>   | <i>Z</i> -value | <i>p</i> |
|-----------------|--------------------|--------------------|-----------------|----------|
|                 | Observed mean (SD) | Observed mean (SD) |                 |          |
| <b>HADS</b>     |                    |                    |                 |          |
| HADS-Anxiety    | 5.6 (±4.8)         | 4.7 (±4.3)         | 2.337           | 0.02*    |
| HADS-Depression | 3.4 (±3.5)         | 2.6 (±2.6)         | 2.199           | 0.03*    |
| Total score     | 9.0 (±7.8)         | 7.3 (±6.5)         | 2.579           | 0.01*    |
| <b>EQ-5D-3L</b> |                    |                    |                 |          |
| EQ VAS (n=67)   | 73 (±18)           | 77 (±19)           | 2.292           | 0.02*    |
| Index value     | 0.82 (±0.26)       | 0.88 (±0.15)       | 2.966           | 0.003*   |

\*  $p < 0.05$  indicates statistical significance

Abbreviations: HADS, hospital anxiety and depression scale; EQ-5D-3L, European quality of life 5 dimensions 3 level; SD, standard deviation; VAS, visual analogue scale

**Table 3.** Predictors of psychological distress and self-assessed poor health (n=70).

| Predictors                  | 3 months          |      |          |                       | 12 months          |      |          |                       |
|-----------------------------|-------------------|------|----------|-----------------------|--------------------|------|----------|-----------------------|
|                             | OR (95% CI)       | SE   | <i>p</i> | <i>R</i> <sup>2</sup> | OR (95% CI)        | SE   | <i>p</i> | <i>R</i> <sup>2</sup> |
| <b>HADS-Anxiety</b>         |                   |      |          |                       |                    |      |          |                       |
| Age                         | 0.99 (0.95-1.03)  | 0.02 | 0.63     | 0.195                 | 0.98 (0.93-1.03)   | 0.02 | 0.40     | 0.276                 |
| Comorbidity                 | 4.07 (1.07-17.00) | 0.73 | 0.04*    |                       | 3.79 (0.70-20.42)  | 0.86 | 0.12     |                       |
| Being female                | 4.94 (0.91-26.83) | 0.86 | 0.06     |                       | 9.23 (1.68-50.61)  | 0.78 | 0.01*    |                       |
| Hypothermia                 | 1.25 (0.43-3.62)  | 0.54 | 0.68     |                       | 1.20 (0.38-3.76)   | 0.58 | 0.75     |                       |
| <b>HADS-Depression</b>      |                   |      |          |                       |                    |      |          |                       |
| Age                         | 0.99 (0.94-1.04)  | 0.03 | 0.57     | 0.136                 | 0.99 (0.94-1.05)   | 0.03 | 0.81     | 0.300                 |
| Comorbidity                 | 1.45 (0.33-6.44)  | 0.76 | 0.62     |                       | 1.20 (0.25-5.85)   | 0.81 | 0.82     |                       |
| Being female                | 3.71 (0.90-15.37) | 0.78 | 0.07     |                       | 14.78 (2.60-83.87) | 0.87 | 0.002*   |                       |
| Hypothermia                 | 1.16 (0.37-3.61)  | 0.58 | 0.81     |                       | 2.75 (0.82-9.28)   | 0.62 | 0.10     |                       |
| ICD                         | 1.52 (0.40-5.69)  | 0.68 | 0.54     |                       | 0.55 (0.11-2.77)   | 0.82 | 0.47     |                       |
| <b>EQ-5D-3L index value</b> |                   |      |          |                       |                    |      |          |                       |
| Age                         | 0.91 (0.86-0.97)  | 0.03 | 0.002*   | 0.362                 | 0.93 (0.89-0.98)   | 0.02 | 0.003*   | 0.288                 |
| Comorbidity                 | 1.19 (0.28-5.01)  | 0.73 | 0.81     |                       | 2.53 (0.51-12.69)  | 0.82 | 0.26     |                       |
| Being female                | 6.33 (1.03-38.81) | 0.93 | 0.04*    |                       | 2.09 (0.46-9.40)   | 0.77 | 0.34     |                       |

1  
2  
3  
4 \*  $p < 0.05$  indicates statistical significance  
5  
6

---

7 Abbreviations: HADS, hospital anxiety and depression scale; EQ-5D-3L, European quality of life 5 dimensions 3 level; OR,  
8 odds ratio; SE, standard error; CI, confidence interval; ICD, implantable cardioverter defibrillator; PCI, percutaneous coronary  
9 intervention  
10  
11

---

12  
13  
14  
15  
16  
17  
18  
19  
20  
21  
22  
23  
24  
25  
26  
27  
28  
29  
30  
31  
32  
33  
34  
35  
36  
37  
38  
39  
40  
41  
42  
43  
44  
45  
46  
47  
48  
49  
50  
51  
52  
53  
54  
55  
56  
57  
58  
59  
60

For peer review only

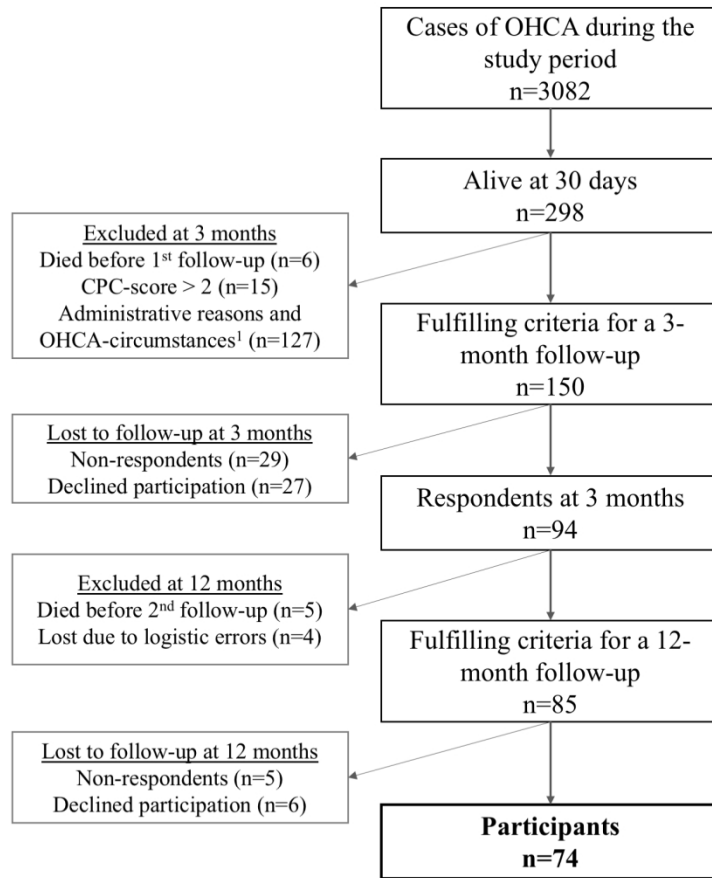

<sup>1)</sup> Administrative reasons include survivors documented with an incorrect social security number, not able to be identified within 3 months or not residing in the region. OHCA-circumstances include trauma, attempted suicide, drowning and intoxication as cause of the cardiac arrest or severe illness afterwards.

Figure 1. Flowchart of study participants.

249x299mm (190 x 190 DPI)





Figure 2. Reported outcomes in the HADS and EQ-5D-3L at three and 12 months (n=74). Diagonal lines divide the participants with regard to what time they reported the highest score. Scores from 7 participants are missing in EQ VAS.

245x245mm (300 x 300 DPI)

**STROBE 2007 (v4) checklist of items to be included in reports of observational studies in epidemiology\***  
**Checklist for cohort, case-control, and cross-sectional studies (combined)**

| Section/Topic             | Item # | Recommendation                                                                                                                                                                                                                                                                                                                                                                                                                                                         | Reported on page #     |
|---------------------------|--------|------------------------------------------------------------------------------------------------------------------------------------------------------------------------------------------------------------------------------------------------------------------------------------------------------------------------------------------------------------------------------------------------------------------------------------------------------------------------|------------------------|
| Title and abstract        | 1      | (a) Indicate the study's design with a commonly used term in the title or the abstract                                                                                                                                                                                                                                                                                                                                                                                 | 1                      |
|                           |        | (b) Provide in the abstract an informative and balanced summary of what was done and what was found                                                                                                                                                                                                                                                                                                                                                                    | 2                      |
| <b>Introduction</b>       |        |                                                                                                                                                                                                                                                                                                                                                                                                                                                                        |                        |
| Background/rationale      | 2      | Explain the scientific background and rationale for the investigation being reported                                                                                                                                                                                                                                                                                                                                                                                   | 3                      |
| Objectives                | 3      | State specific objectives, including any pre-specified hypotheses                                                                                                                                                                                                                                                                                                                                                                                                      | 3                      |
| <b>Methods</b>            |        |                                                                                                                                                                                                                                                                                                                                                                                                                                                                        |                        |
| Study design              | 4      | Present key elements of study design early in the paper                                                                                                                                                                                                                                                                                                                                                                                                                | 4-5                    |
| Setting                   | 5      | Describe the setting, locations, and relevant dates, including periods of recruitment, exposure, follow-up, and data collection                                                                                                                                                                                                                                                                                                                                        | 4                      |
| Participants              | 6      | (a) <i>Cohort study</i> —Give the eligibility criteria, and the sources and methods of selection of participants. Describe methods of follow-up<br><i>Case-control study</i> —Give the eligibility criteria, and the sources and methods of case ascertainment and control selection. Give the rationale for the choice of cases and controls<br><i>Cross-sectional study</i> —Give the eligibility criteria, and the sources and methods of selection of participants | 4                      |
|                           |        | (b) <i>Cohort study</i> —For matched studies, give matching criteria and number of exposed and unexposed<br><i>Case-control study</i> —For matched studies, give matching criteria and the number of controls per case                                                                                                                                                                                                                                                 |                        |
| Variables                 | 7      | Clearly define all outcomes, exposures, predictors, potential confounders, and effect modifiers. Give diagnostic criteria, if applicable                                                                                                                                                                                                                                                                                                                               | 4-5                    |
| Data sources/ measurement | 8*     | For each variable of interest, give sources of data and details of methods of assessment (measurement). Describe comparability of assessment methods if there is more than one group                                                                                                                                                                                                                                                                                   | 4-5                    |
| Bias                      | 9      | Describe any efforts to address potential sources of bias                                                                                                                                                                                                                                                                                                                                                                                                              | Not applicable         |
| Study size                | 10     | Explain how the study size was arrived at                                                                                                                                                                                                                                                                                                                                                                                                                              | 4                      |
| Quantitative variables    | 11     | Explain how quantitative variables were handled in the analyses. If applicable, describe which groupings were chosen and why                                                                                                                                                                                                                                                                                                                                           | 5-6                    |
| Statistical methods       | 12     | (a) Describe all statistical methods, including those used to control for confounding                                                                                                                                                                                                                                                                                                                                                                                  | 5-6                    |
|                           |        | (b) Describe any methods used to examine subgroups and interactions                                                                                                                                                                                                                                                                                                                                                                                                    | Not applicable         |
|                           |        | (c) Explain how missing data were addressed                                                                                                                                                                                                                                                                                                                                                                                                                            | See tables and figures |
|                           |        | (d) <i>Cohort study</i> —If applicable, explain how loss to follow-up was addressed<br><i>Case-control study</i> —If applicable, explain how matching of cases and controls was addressed                                                                                                                                                                                                                                                                              | 6                      |

|                          |     |                                                                                                                                                                                                              |                |
|--------------------------|-----|--------------------------------------------------------------------------------------------------------------------------------------------------------------------------------------------------------------|----------------|
|                          |     | <i>Cross-sectional study</i> —If applicable, describe analytical methods taking account of sampling strategy                                                                                                 |                |
|                          |     | (e) Describe any sensitivity analyses                                                                                                                                                                        | Not applicable |
| <b>Results</b>           |     |                                                                                                                                                                                                              |                |
| Participants             | 13* | (a) Report numbers of individuals at each stage of study—eg numbers potentially eligible, examined for eligibility, confirmed eligible, included in the study, completing follow-up, and analysed            | 6              |
|                          |     | (b) Give reasons for non-participation at each stage                                                                                                                                                         | 6              |
|                          |     | (c) Consider use of a flow diagram                                                                                                                                                                           | 6              |
| Descriptive data         | 14* | (a) Give characteristics of study participants (eg demographic, clinical, social) and information on exposures and potential confounders                                                                     | 6              |
|                          |     | (b) Indicate number of participants with missing data for each variable of interest                                                                                                                          | 6              |
|                          |     | (c) <i>Cohort study</i> —Summarise follow-up time (eg, average and total amount)                                                                                                                             | 6              |
| Outcome data             | 15* | <i>Cohort study</i> —Report numbers of outcome events or summary measures over time                                                                                                                          | Not applicable |
|                          |     | <i>Case-control study</i> —Report numbers in each exposure category, or summary measures of exposure                                                                                                         | Not applicable |
|                          |     | <i>Cross-sectional study</i> —Report numbers of outcome events or summary measures                                                                                                                           | Not applicable |
| Main results             | 16  | (a) Give unadjusted estimates and, if applicable, confounder-adjusted estimates and their precision (eg, 95% confidence interval). Make clear which confounders were adjusted for and why they were included | 7              |
|                          |     | (b) Report category boundaries when continuous variables were categorized                                                                                                                                    | 7              |
|                          |     | (c) If relevant, consider translating estimates of relative risk into absolute risk for a meaningful time period                                                                                             | Not applicable |
| Other analyses           | 17  | Report other analyses done—eg analyses of subgroups and interactions, and sensitivity analyses                                                                                                               | Not applicable |
| <b>Discussion</b>        |     |                                                                                                                                                                                                              |                |
| Key results              | 18  | Summarise key results with reference to study objectives                                                                                                                                                     | 7-8            |
| Limitations              | 19  | Discuss limitations of the study, taking into account sources of potential bias or imprecision. Discuss both direction and magnitude of any potential bias                                                   | 9              |
| Interpretation           | 20  | Give a cautious overall interpretation of results considering objectives, limitations, multiplicity of analyses, results from similar studies, and other relevant evidence                                   | 8-9            |
| Generalisability         | 21  | Discuss the generalisability (external validity) of the study results                                                                                                                                        | 8-9            |
| <b>Other information</b> |     |                                                                                                                                                                                                              |                |
| Funding                  | 22  | Give the source of funding and the role of the funders for the present study and, if applicable, for the original study on which the present article is based                                                | 10             |

\*Give information separately for cases and controls in case-control studies and, if applicable, for exposed and unexposed groups in cohort and cross-sectional studies.

**Note:** An Explanation and Elaboration article discusses each checklist item and gives methodological background and published examples of transparent reporting. The STROBE checklist is best used in conjunction with this article (freely available on the Web sites of PLoS Medicine at <http://www.plosmedicine.org/>, Annals of Internal Medicine at <http://www.annals.org/>, and Epidemiology at <http://www.epidem.com/>). Information on the STROBE Initiative is available at [www.strobe-statement.org](http://www.strobe-statement.org).

# BMJ Open

## A one year longitudinal study of psychological distress and self-assessed health in survivors of out-of-hospital cardiac arrest.

|                                 |                                                                                                                                                                                                                                                                                                                                                                                                                                                                                                |
|---------------------------------|------------------------------------------------------------------------------------------------------------------------------------------------------------------------------------------------------------------------------------------------------------------------------------------------------------------------------------------------------------------------------------------------------------------------------------------------------------------------------------------------|
| Journal:                        | <i>BMJ Open</i>                                                                                                                                                                                                                                                                                                                                                                                                                                                                                |
| Manuscript ID                   | bmjopen-2019-029756.R2                                                                                                                                                                                                                                                                                                                                                                                                                                                                         |
| Article Type:                   | Research                                                                                                                                                                                                                                                                                                                                                                                                                                                                                       |
| Date Submitted by the Author:   | 04-Jun-2019                                                                                                                                                                                                                                                                                                                                                                                                                                                                                    |
| Complete List of Authors:       | Viktorisson, Adam; Goteborgs universitet Institutionen for neurovetenskap och fysiologi, Rehabilitation medicine Sunnerhagen, Katharina; Univ of Gothenburg, Inst of Neuroscience and Physiology<br>Johansson, Dongni; Goteborgs universitet Sahlgrenska Akademin, Department of Clinical Neuroscience at Institute of Neuroscience and Physiology<br>Herlitz, Johan; Faculty of Caring Science, Work Life and Social Welfare, University of Borås<br>Axelsson, Åsa; University of Gothenburg, |
| <b>Primary Subject Heading</b>: | Rehabilitation medicine                                                                                                                                                                                                                                                                                                                                                                                                                                                                        |
| Secondary Subject Heading:      | Cardiovascular medicine                                                                                                                                                                                                                                                                                                                                                                                                                                                                        |
| Keywords:                       | Cardiac arrest, Follow-up, Outcome, Anxiety, Depression, Quality of life                                                                                                                                                                                                                                                                                                                                                                                                                       |
|                                 |                                                                                                                                                                                                                                                                                                                                                                                                                                                                                                |

SCHOLARONE™  
Manuscripts

1  
2  
3 **Running headline:** A one year longitudinal study of psychological distress and self-assessed  
4 health in survivors of out-of-hospital cardiac arrest.  
5  
6  
7

8  
9 Adam Viktorisson<sup>1,\*</sup>, Katharina S Sunnerhagen<sup>1</sup>, Dongni Johansson<sup>1</sup>, Johan Herlitz<sup>2,3</sup>, Åsa B  
10 Axelsson<sup>4</sup>  
11  
12  
13  
14  
15

16 1. Institute of Neuroscience and Physiology, Rehabilitation Medicine, Sahlgrenska Academy,  
17 University of Gothenburg, Box 430, SE 405 30 Gothenburg, Sweden.

18 2. Institute of Internal Medicine, Department of Metabolism and Cardiovascular Research,  
19 Sahlgrenska University Hospital, SE 413 45 Gothenburg, Sweden.  
20  
21

22 3. Prehospiten Centre of Prehospital Research, Faculty of Caring Science, Work Life and  
23 Social Welfare, University of Borås, Sweden.  
24  
25

26 4. Institute of Health and Care Sciences, Sahlgrenska Academy, University of Gothenburg,  
27 Box 457, SE 405 30 Gothenburg, Sweden.  
28  
29  
30  
31  
32

33 \* Corresponding author: Adam Viktorisson

34 Sahlgrenska Academy,

35 Institute of Neuroscience and Physiology

36 Per Dubbsgatan 14, 3<sup>rd</sup> floor

37 PO Box 430

38 SE 405 30, Gothenburg

39 Sweden.  
40  
41  
42  
43  
44

45 E-mail address: [adam.viktorisson@gu.se](mailto:adam.viktorisson@gu.se)

46 Phone: +46-31-342 2803  
47  
48  
49  
50  
51

52 **Word count:** 3270  
53  
54  
55  
56  
57  
58  
59  
60

## Abstract

*Objectives:* Few studies have investigated the psychological and health-related outcome after out-of-hospital cardiac arrest (OHCA) over time. This longitudinal study aims to evaluate psychological distress in terms of anxiety and depression, self-assessed health, and predictors of these outcomes in survivors of OHCA, three and 12 months after resuscitation.

*Methods:* Recruitment took place from 2008 to 2011 and survivors of OHCA were identified through the national Swedish Cardiopulmonary Resuscitation Registry. Inclusion criteria were age  $\geq 18$  years, survival  $\geq 12$  months and a Cerebral Performance Category score  $\leq 2$ . Questionnaires containing the Hospital Anxiety and Depression scale (HADS) and European Quality of Life 5 Dimensions 3 Level (EQ-5D-3L) were administered at three and 12 months after the OHCA. Participants were also asked to report treatment-requiring comorbidities.

*Results:* Of 298 survivors, 85 were eligible for this study and 74 responded. Anxiety was reported by 22 survivors at three months and by 17 at 12 months, while depression was reported by 10 at three months and 4 at 12 months. The mean EQ-5D-3L index value increased from 0.82 ( $\pm 0.26$ ) to 0.88 ( $\pm 0.15$ ) over time. There were significantly less symptoms of psychological distress ( $p=0.01$ ) and better self-assessed health ( $p=0.003$ ) at 12-months. Treatment-requiring comorbidity predicted anxiety (OR 4.07,  $p=0.04$ ), while being female and young age predicted poor health (OR 6.33,  $p=0.04$ ; OR 0.91,  $p=0.002$ ) at three months. At 12 months, being female was linked to anxiety (OR 9.23,  $p=0.01$ ) and depression (OR 14.78,  $p=0.002$ ), while young age predicted poor health (OR 0.93,  $p=0.003$ ).

*Conclusion:* The level of psychological distress and self-assessed health improve among survivors of OHCA between three and 12 months after resuscitation. Higher levels of psychological distress can be expected among female survivors and those with comorbidity, while survivors of young age and who are female are at greater risk of poor health.

## Strengths and limitations of this study

- Data were collected from virtually every out-of-hospital cardiac arrest survivor within the course of 4 years in a large region of Sweden.
- A nurse responsible for data collection was placed at each hospital in the region to match survivors with data from the Swedish Cardiopulmonary Resuscitation Registry.
- Only survivors with a cerebral performance category score of  $\leq 2$  were included.

- The use of generic measures of health has a limited ability to capture the complexity of the health state in survivors of cardiac arrest.

**Key words:** Cardiac arrest; Follow-up; Outcome; Anxiety; Depression; Quality of life.

## Introduction

Out-of-hospital cardiac arrest (OHCA) is a deadly condition that affects approximately 5000 inhabitants in Sweden each year (1). The survival rate of OHCA is low, although great efforts have been made to raise the number of survivors in recent years; consequently, the 30-day survival rate in Sweden has increased from 4.5% in 1992 to 11.4% in 2017 (2). When the heart stops hypoxic brain injury occurs within minutes and is the most critical factor in determining the chance of survival and level of functioning, if resuscitation is successful (3). Following cerebral hypoxia, cardiac arrest survivors are known to be at risk of cognitive and emotional deficits (4-7). Although most survivors with a good neurological outcome return to high function and quality of life (8, 9), long-term psychological problems have been reported by up to one-third in Swedish-samples (10, 11). Furthermore, the ability to pinpoint survivors who need psychiatric rehabilitation will become more important as survival rates continue to increase.

There is already an extensive body of knowledge regarding the outcome after cardiac arrest in different patient populations and time points. Time to awakening, gender, age, role of bystander, use of hypothermia and percutaneous coronary intervention (PCI) have previously been related to the outcome after cardiac arrest (6, 12, 13). However, few studies have investigated the psychological and health-related outcome in the same sample over time (9, 10, 14), and little is known about factors associated with post cardiac arrest improvement in these aspects. The interpretation of the available literature is complicated by high heterogeneity in study outcomes, and knowledge regarding psychological distress and self-assessed health after OHCA in relation to the average population is lacking (7, 15).

We have previously reported that reduced well-being is experienced by half of OHCA survivors at three months, and that female survivors report significantly more anxiety and worse health compared to males (16). In this study, we will investigate how the psychological and health-related outcomes change in survivors of OHCA with good neurological functioning between three and 12 months after resuscitation. Further, we will also evaluate gender differences as well as predictors of psychological distress and self-assessed poor health at these time points.

## Methods

### *Design and setting*

This was a longitudinal study with self-administered postal questionnaires sent to survivors three and 12 months after the OHCA. The setting was a region in Sweden with 1.6 million inhabitants and nine hospitals that treat cardiac arrest. The frequency of OHCA was 850 cases annually and the survival rate approximately 10%.

### *Study population*

The study population was identified through the national Swedish Cardiopulmonary Resuscitation Registry (SCRR). Every person who suffered from an OHCA and for whom resuscitation was initiated should be included in the SCRR. To ensure complete coverage, there was a specially-trained nurse at each hospital who could identify missing cases and match patients treated for OHCA with data from the SCRR.

Recruitment took place from 1st January 2008 to 31st December 2011 and every adult survivor of OHCA in the region was assessed for inclusion. The study inclusion criteria were age  $\geq 18$  years, survival  $\geq 12$  months, and a Cerebral Performance Category (CPC) score  $\leq 2$  at discharge, denoting good neurological functioning (17). Exclusion criteria were cardiac arrest due to trauma, attempted suicide, intoxication, or abuse. Survivors with other severe illness and survivors treated but not residing in the region were also excluded.

### *Procedure and questionnaire*

Eligible survivors received a postal questionnaire in Swedish three months after the OHCA. Survivors who responded to the questionnaires and gave a written consent were included. Participants at three months then received a second questionnaire at 12 months. A reminder was sent if no response was received after three weeks. The questionnaire consisted of the Hospital Anxiety and Depression scale (HADS) and European Quality of Life 5 Dimensions 3 Level (EQ-5D-3L). Study participants were also asked to report treatment-requiring comorbidity.

The HADS is a 14-item screening instrument developed to detect psychological distress in terms of clinically significant anxiety and/or depression (18). It is divided into two subscales, seven items regarding anxiety (HADS-anxiety) and seven items regarding symptoms of depression (HADS-depression). Each item has four levels, scored 0-3, with a maximum score of 21 in each subscale. Scoring  $>7$  in one subscale indicates mild to moderate problems and a



1  
2  
3 score >10 indicates severe problems. Although the HADS has never been thoroughly  
4 evaluated in a cardiac arrest population, it is considered a reliable measurement for depression  
5 and anxiety in patients with somatic illness (19) and is frequently used in cardiovascular  
6 research (7).  
7  
8  
9

10 EQ-5D-3L is designed to measure subjective health and includes the EQ-5D-3L descriptive  
11 system and a visual analogue scale (EQ VAS) (20). The descriptive system  
12 comprises five dimensions (mobility, self-care, usual activities, pain/discomfort and  
13 anxiety/depression); each dimension has three levels (no problems, moderate problems and  
14 severe problems) denoting a score of 1-3. The total score in the EQ-5D-3L descriptive system  
15 can be converted to an index-value which ranges between -0.594 and 1.00, calculated with  
16 the UK EQ-5D index tariff (21). An index value of 1.00 indicates full health, while negative  
17 values represents health states worse than death (20). EQ VAS is visualized as a continuum  
18 of value scale where the patient assesses his or her current health on a scale from zero to 100,  
19 with endpoints labelled 'best imaginable health state' and 'worst imaginable health state'.  
20 EQ-5D-3L is commonly used in cardiovascular research (22). However, the use of EQ-5D-3L  
21 in OHCA populations has been questioned as the instrument has shown a limited ability to  
22 differentiate between survivors of good health (23).  
23  
24  
25  
26  
27  
28  
29  
30  
31  
32  
33

### 34 *Statistics and data analysis*

35 Statistical analyses were executed with IBM SPSS Statistics 24.0 (Armonk, NY: IBM Corp).  
36 All p-values were two-sided and interpreted at a 0.05 significance level. Nonparametric tests  
37 were used for all comparisons as all dependent variables were non-normally distributed. The  
38  $\chi^2$  test was applied for nominal values and the Mann-Whitney U-test for ordinal values.  
39 Wilcoxon signed ranks test was used to explore the change between three and 12 months.  
40 Predictors of psychological distress (HADS) and self-assessed poor health (EQ-5D-3L index  
41 values) were investigated using multivariate binary logistic regression models. The outcome  
42 was dichotomised as good or bad with regard to the mean scores in two Swedish reference  
43 populations, matched to gender and age-group. A bad outcome was considered a score two  
44 standard deviations below the mean of the reference population. Reference values regarding  
45 the HADS were drawn from a random sample gathered 1997 in Jämtland County, Sweden  
46 (n=624) (24); similarly, reference values regarding the EQ-5D-3L index values were drawn  
47 from a random sample gathered 2001 in Stockholm County, Sweden (n=3069) (25). The  
48 predictors were included based on clinical reasoning and are presented in Table 1. With  
49 regard to the sample size, only six variables were evaluated and correlations between them  
50  
51  
52  
53  
54  
55  
56  
57  
58  
59  
60

1  
2  
3 were examined using Spearman's rank correlation; only variables with a Spearman's rho  $\pm$   
4  $\leq 0.7$  were accepted. Univariate analysis was conducted separately between each individual  
5 predictor. The significant level of the univariate analysis was 0.25 and predictors with a p-  
6 value  $> 0.25$  were excluded from further analysis. Hosmer and Lemeshow tests and Receiver  
7 Operating Characteristics curves (ROC-curves) were performed to ensure the reliability of the  
8 logistic regression models.  
9

### 15 *Patient and public involvement*

16 None of the included patients were involved in the design or conduction of this study and no  
17 patient opinion regarding the subject has been obtained. The results will be reported to the  
18 Health & Medical Care Committee of the Regional Executive Board, Region Västra  
19 Götaland, Sweden.  
20  
21  
22  
23

### 25 *Ethics*

26 Ethical permission was granted by the Regional Ethics Review board, Western Sweden (No.  
27 465-07). Written consent was obtained from all participants.  
28  
29  
30  
31

### 32 **Results**

33 There were 3082 cases of OHCA in the region during the study period, of which 298 were  
34 alive at 30 days. One-hundred-fifty survivors fulfilled the inclusion criteria for a three-month  
35 follow-up and 94 responded. Of the respondents at three months, 85 were included at 12  
36 months and 74 responded again (87% response rate); in the group that did not receive a  
37 second questionnaire, five had died and four were lost due to logistical errors (Figure 1).  
38  
39  
40  
41

42 The representativeness of the study population has been investigated in a prior study (26),  
43 and there were no significant differences regarding age, gender, cardiac arrest circumstances,  
44 or in-hospital interventions between respondents and non-respondents. However, there were  
45 differences between participants and the survivors that only responded once. Double  
46 respondents were significantly younger ( $Z=2.316$ ,  $p=0.021$ ), had a lower frequency of cardiac  
47 arrest at home ( $\chi^2=6.249$ ,  $p=0.014$ ), and a higher frequency of ventricular fibrillation or  
48 ventricular tachycardia as initial rhythm ( $\chi^2=5.067$ ,  $p=0.032$ ). Background characteristics and  
49 self-reported comorbidity of the participants are presented in Table 1.  
50  
51  
52  
53  
54  
55

56 Mild to moderate anxiety ( $>7$  in HADS-A) was reported by 22 (30%) survivors at the three  
57 months follow-up and by 17 (23%) at 12 months. Mild to moderate depression ( $>7$  in HADS-  
58 D) was reported by 10 (14%) survivors at three months and by four (5%) at 12 months. A  
59  
60

1  
2  
3 score indicating severe anxiety (>10 in HADS-A) was reported by 12 survivors at three  
4 months and by eight at 12 months, while severe depression (>10 in HADS-D) was reported  
5 by three at three months and one at 12 months. Overall, survivors of OHCA reported a  
6 significantly improved psychological and health-related outcome over time (Table 2). About  
7 half of the survivors reported less psychological distress in the HADS at 12 months (51%  
8 decrease in anxiety and 46% in symptoms of depression); although one-third reported an  
9 increase in psychological distress (30% increase in anxiety and 28% in symptoms of  
10 depression). Two-thirds of female survivors reported more psychological distress at the 12-  
11 month follow up, corresponding to one-fifth among male survivors. Comparably, half of the  
12 survivors reported better self-assessed health at 12 months in EQ-5D-3L, whereas 41%  
13 reported the same health state at three and 12 months. Among the survivors who remained  
14 unchanged, 73% reported an EQ-5D-3L index value of 1.00, denoting full health at both time  
15 points. However, only one survivor entered full health at both times in EQ VAS (Figure 2).

16  
17 Binary logistic regression analyses were performed to find predictors of psychological  
18 distress and self-assessed poor health (Table 3). The presence of treatment-requiring  
19 comorbidity was found to predict more anxiety at three months after resuscitation (OR 4.07,  
20  $p=0.04$ ), but there was no significant odds ratio regarding comorbidity at 12 months; instead,  
21 being female was found to predict more anxiety (OR 9.23,  $p=0.01$ ) and more symptoms of  
22 depression (OR 14.78,  $p=0.002$ ) at this time. Being female was also found to predict self-  
23 assessed poor health at three months (OR 6.33,  $p=0.04$ ), while young age was found to predict  
24 poor health at three and 12 months, respectively (OR 0.91,  $p=0.002$ ; OR 0.93,  $p=0.003$ ).

## 40 41 **Discussion**

42 One objective of this study was to investigate how the psychological and health-related  
43 outcomes change between three and 12 months in survivors of OHCA with good neurological  
44 functioning. We found an encouraging progression as survivors at large showed less  
45 psychological distress and better self-assessed health over time. In comparison, participants in  
46 this study even surpassed the average level of depression and self-assessed health in the  
47 Swedish population at their 12-month follow-up (24, 25). However, we also found that even  
48 though about half of OHCA survivors report a decrease in psychological distress between  
49 three and 12 months, almost one-third report increased psychological distress; hence, our  
50 results indicate that the psychological outcome after OHCA may differ considerably on an  
51 individual level.  
52  
53  
54  
55  
56  
57  
58  
59  
60

1  
2  
3 As stated earlier, few prior longitudinal studies have investigated the psychological and  
4 health-related outcomes after cardiac arrest. In accordance with our results, two small sample  
5 studies have previously reported a decrease of anxiety and depressive symptoms in cardiac  
6 arrest survivors over time (13, 27). In contrast, a rather large prospective study found no  
7 change in anxiety or depressive symptoms between one and 12 months (14). It is possible that  
8 the heterogeneity in psychological outcomes observed in this study could explain a part of the  
9 discrepancies in the available literature. As regards self-assessed health, the improvements  
10 seen in this study confirm the results of two previous longitudinal studies (9, 10). However,  
11 these previous studies found that the greatest health-related improvements occurred in the  
12 early stages of recovery, within three months after cardiac arrest (9, 10). Moreover, although  
13 the 'minimal clinically important difference' in the HADS and EQ-5D-3L among survivors of  
14 cardiac arrest is unknown, estimates from other patient populations indicate that the  
15 improvements seen in this study might not be clinically noticeable (28, 29).

16  
17 A second objective was to evaluate predictors of psychological distress self-assessed poor  
18 health after OHCA. Since it is already known that cardiac arrest survivors generally report  
19 few psychological problems and good health, it is difficult to define a threshold for a bad  
20 outcome among those who perform well neurologically. In this study, the outcome was  
21 dichotomised as good or bad in comparison to mean scores from the average Swedish  
22 population. Prior studies have concluded that many survivors reach an psychological state and  
23 health comparable to the average population, although no study has previously investigated  
24 predictors of this outcome (9, 10, 30). In addition, there is also a lack of knowledge regarding  
25 factors associated with post cardiac arrest improvement over time (13, 31). We found that  
26 comorbidity is associated with higher levels of anxiety compared to the average population at  
27 three months after OHCA. However, we did not find a significant association between  
28 comorbidity and anxiety or depression at the 12-month follow-up. In contrast, being female  
29 was strongly associated with psychological distress at one year after resuscitation, but this  
30 was not significant at three months. We also found a significant association between being  
31 female and self-assessed poor health at three months, while young age was associated with  
32 self-assessed poor health at both three and 12 months.

33  
34 Studies investigating prognostic factors regarding the psychological or health-related  
35 outcomes after cardiac arrest are scarce. However, receiving an ICD has been linked to higher  
36 levels of psychological distress (32), but this effect has not been shown in a cardiac arrest  
37 population (14). We did not find any significant association regarding ICD in our regression  
38 models either. Young age and being female have previously been associated with anxiety  
39  
40  
41  
42  
43  
44  
45  
46  
47  
48  
49  
50  
51  
52  
53  
54  
55  
56  
57  
58  
59  
60

1  
2  
3 among cardiac arrest survivors (30), but there were no significant association between  
4 psychological distress and age in our study population. Nevertheless, we did find a  
5 considerably higher likelihood of depression among female survivors of OHCA at 12 months,  
6 which has not previously been reported. Also novel is the likelihood of a better self-assessed  
7 health among survivors of higher age.  
8  
9

10  
11 The European Resuscitation Council has provided guidelines for post cardiac arrest  
12 rehabilitation since 2015 and has pointed out the need of a structured follow-up care,  
13 including physical, neurological, and emotional screening (33). Still, far from all cardiac  
14 arrest survivors in Sweden are offered rehabilitation or neuropsychological evaluation, despite  
15 recommendations from the Swedish Resuscitation Council (34, 35). Instead, survivors in  
16 Sweden are often followed based on the aetiology of the cardiac arrest with little to no focus  
17 on emotional sequelae (35, 36). Our results indicate that even if the majority of OHCA  
18 survivors live without psychological distress and with good self-assessed health, there are  
19 individuals that experience major problems. Consequently, it should be expected that some  
20 survivors will benefit from psychiatric rehabilitation, and survivors of young age, who are  
21 female, and those with treatment-requiring comorbidity should be screened early on.  
22  
23  
24  
25  
26  
27  
28  
29  
30  
31

### 32 *Strengths and limitations*

33  
34 This study has several strengths. During the study period of four years, a specially-trained  
35 nurse was placed at every hospital in a large region of Sweden. With this approach, we were  
36 able to collect data from virtually every case of OHCA. The study design also allowed us to  
37 match non-respondents with data collected from the SCRR at the time of their hospitalisation,  
38 thus enabling comparisons between respondents and non-respondents. Consequently, we were  
39 able to confirm that the study population represents the group at large in these aspects.  
40  
41 Another strength is that the outcomes in this study could be compared with the average  
42 Swedish population. Knowledge regarding factors of importance for a psychological state and  
43 self-assessed health in line with the normal population after OHCA in Sweden is missing.  
44  
45 This information will help to generalise the overall picture of OHCA survival and provide  
46 guidance regarding which survivors who need psychiatric rehabilitation. Furthermore, the  
47 response rate was very high at 12 months.  
48  
49  
50  
51  
52  
53

54  
55 The main limitations of this study are the retrospective design and the restrictive inclusion  
56 of survivors with good neurological functioning (CPC-score  $\leq 2$ ), which limits the  
57 applicability on OHCA survivors more broadly. However, we made the assessment that  
58 inclusion of survivors with a severe cerebral dysfunction would complicate the interpretability  
59  
60

1  
2  
3 of the results. Furthermore, it is not possible to differentiate between patients with a CPC-  
4 score of one and two. However, as mentioned above, we lack knowledge of the minimal  
5 clinically important difference regarding the HADS and EQ-5D-3L in this population. The  
6 strict inclusion is also reflected by the relatively small sample size, resulting in a low count of  
7 events per variable in the logistic regression (five variables were evaluated in 70 participants),  
8 why the significance of these results should be interpreted with caution. Another methodical  
9 limitation in this study is the use of EQ-5D-3L to measure self-assessed health. A recent study  
10 concluded that EQ-5D-3L might underestimate the health in OHCA survivors, yielding high  
11 ceiling effects, which was apparent in the EQ-5D-3L descriptive system in this study as well  
12 (23). Although EQ VAS showed higher interpretability with a more varied outcome in our  
13 study population, it is known that generic measures of health often fail to capture the true  
14 complexity of the health state in survivors of cardiac arrest (37). Finally, some survivors were  
15 excluded due to severe illness and a few non-respondents mentioned poor health as the reason  
16 for not participating. Therefore, it is possible that the participants in this study had a better  
17 outcome than survivors more generally.  
18  
19  
20  
21  
22  
23  
24  
25  
26  
27  
28  
29

### 30 **Conclusions**

31 On a group level, there is a significant improvement in the psychological and health-related  
32 outcomes among survivors of OHCA between three and 12 months after resuscitation. Higher  
33 levels of psychological distress can be expected among female survivors and those with  
34 treatment-requiring comorbidity, while young and female survivors are at risk of a self-  
35 assessed poor health. These findings should be considered in the follow-up after OHCA,  
36 although future research is required to identify further predictors regarding the long-term  
37 outcome and chance of improvement post cardiac arrest.  
38  
39  
40  
41  
42  
43  
44  
45

### 46 **Funding**

47 Funding was provided as a grant from the Health & Medical Care Committee of the Regional  
48 Executive Board (VGFOUREG-78031), Region Västra Götaland, Sweden. The guarantor had  
49 no role in the design or execution of this study.  
50  
51  
52  
53  
54

### 55 **Acknowledgements**

56 We would like to thank the dedicated nurses who contributed to our collection of data. We  
57 would also like to thank Dr. Kate Bramley-Moore for English language editing assistance.  
58  
59  
60

### Competing interests

The authors declare no conflict of interest.

### Contributors

All authors have made a substantial contribution to the conception and design of the study. AV analysed the data and wrote the manuscript with input from all authors. KSS and ÅA initiated and planned the study, collected the data, assisted in the interpretation of the data and took part in drafting the manuscript. JH took part in the planning of the study, contributed with external expertise and have continuously revised the manuscript. DJ helped analyze the data and have continuously revised the manuscript.

### Data sharing statement

Due to ethical restrictions, data are available on request. Interested researchers may submit a request for data to the authors (adam.viktorisson@gu.se). According to Swedish regulation: <http://www.epn.se/en/start/regulations/>, the permission to use data is only for what has been applied for and then approved by the Ethical board. To not follow the regulations is seen as scientific misconduct.

### References

1. Stromsoe A, Svensson L, Axelsson AB, Claesson A, Goransson KE, Nordberg P, et al. Improved outcome in Sweden after out-of-hospital cardiac arrest and possible

- 1  
2  
3 association with improvements in every link in the chain of survival. *European heart journal*.  
4 2015;36(14):863-71.
- 5 2. Herlitz J. The Swedish national registry for cardiopulmonary resuscitation -  
6 Annual report 2017. Gothenburg; 2017.
- 7 3. Nolan JP, Neumar RW, Adrie C, Aibiki M, Berg RA, Bottiger BW, et al. Post-  
8 cardiac arrest syndrome: epidemiology, pathophysiology, treatment, and prognostication. A  
9 Scientific Statement from the International Liaison Committee on Resuscitation; the  
10 American Heart Association Emergency Cardiovascular Care Committee; the Council on  
11 Cardiovascular Surgery and Anesthesia; the Council on Cardiopulmonary, Perioperative, and  
12 Critical Care; the Council on Clinical Cardiology; the Council on Stroke. *Resuscitation*.  
13 2008;79(3):350-79.
- 14 4. Lilja G, Nielsen N, Bro-Jeppesen J, Dunford H, Friberg H, Hofgren C, et al.  
15 Return to Work and Participation in Society After Out-of-Hospital Cardiac Arrest. *Circulation*  
16 *Cardiovascular quality and outcomes*. 2018;11(1):e003566.
- 17 5. Moulaert VR, Verbunt JA, van Heugten CM, Wade DT. Cognitive impairments  
18 in survivors of out-of-hospital cardiac arrest: a systematic review. *Resuscitation*.  
19 2009;80(3):297-305.
- 20 6. Wachelder EM, Moulaert VR, van Heugten C, Verbunt JA, Bekkers SC, Wade  
21 DT. Life after survival: long-term daily functioning and quality of life after an out-of-hospital  
22 cardiac arrest. *Resuscitation*. 2009;80(5):517-22.
- 23 7. Wilder Schaaf KP, Artman LK, Peberdy MA, Walker WC, Ornato JP, Gossip  
24 MR, et al. Anxiety, depression, and PTSD following cardiac arrest: a systematic review of the  
25 literature. *Resuscitation*. 2013;84(7):873-7.
- 26 8. Green CR, Botha JA, Tiruvoipati R. Cognitive function, quality of life and  
27 mental health in survivors of our-of-hospital cardiac arrest: a review. *Anaesthesia and*  
28 *intensive care*. 2015;43(5):568-76.
- 29 9. Moulaert VRM, van Heugten CM, Gorgels TPM, Wade DT, Verbunt JA. Long-  
30 term Outcome After Survival of a Cardiac Arrest: A Prospective Longitudinal Cohort Study.  
31 *Neurorehabilitation and neural repair*. 2017;31(6):530-9.
- 32 10. Lundgren-Nilsson A, Rosen H, Hofgren C, Sunnerhagen KS. The first year after  
33 successful cardiac resuscitation: function, activity, participation and quality of life.  
34 *Resuscitation*. 2005;66(3):285-9.
- 35 11. Sunnerhagen KS, Johansson O, Herlitz J, Grimby G. Life after cardiac arrest; a  
36 retrospective study. *Resuscitation*. 1996;31(2):135-40.
- 37 12. Akahane M, Tanabe S, Koike S, Ogawa T, Horiguchi H, Yasunaga H, et al.  
38 Elderly out-of-hospital cardiac arrest has worse outcomes with a family bystander than a non-  
39 family bystander. *International journal of emergency medicine*. 2012;5(1):41.
- 40 13. Sauve MJ, Doolittle N, Walker JA, Paul SM, Scheinman MM. Factors  
41 associated with cognitive recovery after cardiopulmonary resuscitation. *American journal of*  
42 *critical care : an official publication, American Association of Critical-Care Nurses*.  
43 1996;5(2):127-39.
- 44 14. Kamphuis HC, De Leeuw JR, Derksen R, Hauer R, Winnubst JA. A 12-month  
45 quality of life assessment of cardiac arrest survivors treated with or without an implantable  
46 cardioverter defibrillator. *Europace : European pacing, arrhythmias, and cardiac*  
47 *electrophysiology : journal of the working groups on cardiac pacing, arrhythmias, and cardiac*  
48 *cellular electrophysiology of the European Society of Cardiology*. 2002;4(4):417-25.
- 49 15. Whitehead L, Perkins GD, Clarey A, Haywood KL. A systematic review of the  
50 outcomes reported in cardiac arrest clinical trials: the need for a core outcome set.  
51 *Resuscitation*. 2015;88:150-7.
- 52  
53  
54  
55  
56  
57  
58  
59  
60



16. Viktorisson A, Sunnerhagen KS, Poder U, Herlitz J, Axelsson AB. Well-being among survivors of out-of-hospital cardiac arrest: a cross-sectional retrospective study in Sweden. *BMJ open*. 2018;8(6):e021729.
17. Jennett B, Bond M. Assessment of outcome after severe brain damage. *Lancet (London, England)*. 1975;1(7905):480-4.
18. Zigmond AS, Snaith RP. The hospital anxiety and depression scale. *Acta psychiatrica Scandinavica*. 1983;67(6):361-70.
19. Bjelland I, Dahl AA, Haug TT, Neckelmann D. The validity of the Hospital Anxiety and Depression Scale. An updated literature review. *Journal of psychosomatic research*. 2002;52(2):69-77.
20. The EuroQol Group. EuroQol--a new facility for the measurement of health-related quality of life. *Health policy (Amsterdam, Netherlands)*. 1990;16(3):199-208.
21. Sullivan PW, Slejko JF, Sculpher MJ, Ghushchyan V. Catalogue of EQ-5D scores for the United Kingdom. *Medical decision making : an international journal of the Society for Medical Decision Making*. 2011;31(6):800-4.
22. Dyer MT, Goldsmith KA, Sharples LS, Buxton MJ. A review of health utilities using the EQ-5D in studies of cardiovascular disease. *Health and quality of life outcomes*. 2010;8:13.
23. Andrew E, Nehme Z, Bernard S, Smith K. Comparison of health-related quality of life and functional recovery measurement tools in out-of-hospital cardiac arrest survivors. *Resuscitation*. 2016;107:57-64.
24. Lisspers J, Nygren A, Soderman E. Hospital Anxiety and Depression Scale (HAD): some psychometric data for a Swedish sample. *Acta psychiatrica Scandinavica*. 1997;96(4):281-6.
25. Burstrom K, Johannesson M, Diderichsen F. Swedish population health-related quality of life results using the EQ-5D. *Quality of life research : an international journal of quality of life aspects of treatment, care and rehabilitation*. 2001;10(7):621-35.
26. Axelsson AB, Sunnerhagen KS, Herlitz J. Representativity and co-morbidity: Two factors of importance when reporting health status among survivors of cardiac arrest. *Resuscitation*. 2016;101:44-9.
27. Dougherty CM. Longitudinal recovery following sudden cardiac arrest and internal cardioverter defibrillator implantation: survivors and their families. *American journal of critical care : an official publication, American Association of Critical-Care Nurses*. 1994;3(2):145-54.
28. Pickard AS, Neary MP, Cella D. Estimation of minimally important differences in EQ-5D utility and VAS scores in cancer. *Health and quality of life outcomes*. 2007;5:70.
29. Puhan MA, Frey M, Buchi S, Schunemann HJ. The minimal important difference of the hospital anxiety and depression scale in patients with chronic obstructive pulmonary disease. *Health and quality of life outcomes*. 2008;6:46.
30. Lilja G, Nilsson G, Nielsen N, Friberg H, Hassager C, Koopmans M, et al. Anxiety and depression among out-of-hospital cardiac arrest survivors. *Resuscitation*. 2015;97:68-75.
31. Verberne D, Moolaert V, Verbunt J, van Heugten C. Factors predicting quality of life and societal participation after survival of a cardiac arrest: A prognostic longitudinal cohort study. *Resuscitation*. 2018;123:51-7.
32. Magyar-Russell G, Thombs BD, Cai JX, Baveja T, Kuhl EA, Singh PP, et al. The prevalence of anxiety and depression in adults with implantable cardioverter defibrillators: a systematic review. *Journal of psychosomatic research*. 2011;71(4):223-31.
33. Nolan JP, Soar J, Cariou A, Cronberg T, Moolaert VR, Deakin CD, et al. European Resuscitation Council and European Society of Intensive Care Medicine Guidelines

1  
2  
3 for Post-resuscitation Care 2015: Section 5 of the European Resuscitation Council Guidelines  
4 for Resuscitation 2015. Resuscitation. 2015;95:202-22.

5 34. Swedish Resuscitation Council - Post Cardiac Arrest Consult Team. Swedish  
6 guidelines for follow-up after cardiac arrest. 2016.

7 35. Israelsson J, Lilja G, Bremer A, Stevenson-Agren J, Arestedt K. Post cardiac  
8 arrest care and follow-up in Sweden - a national web-survey. BMC nursing. 2016;15:1.

9 36. Egerod I, Risom SS, Thomsen T, Storli SL, Eskerud RS, Holme AN, et al. ICU-  
10 recovery in Scandinavia: a comparative study of intensive care follow-up in Denmark,  
11 Norway and Sweden. Intensive & critical care nursing. 2013;29(2):103-11.

12 37. Haywood K, Whitehead L, Nadkarni VM, Achana F, Beesems S, Bottiger BW,  
13 et al. COSCA (Core Outcome Set for Cardiac Arrest) in Adults: An Advisory Statement From  
14 the International Liaison Committee on Resuscitation. Circulation. 2018;137(22):e783-e801.  
15  
16  
17  
18  
19  
20  
21  
22  
23  
24  
25  
26  
27  
28  
29  
30  
31  
32  
33  
34  
35  
36  
37  
38  
39  
40  
41  
42  
43  
44  
45  
46  
47  
48  
49  
50  
51  
52  
53  
54

## 55 **Figure legends**

56  
57  
58 **Figure 1.** Flowchart of study participants.  
59  
60

1  
2  
3  
4  
5 **Figure 2.** Scatter plot with individual reported outcomes in the HADS and EQ-5D-3L at three  
6 months (x-axis) and 12 months (y-axis). Dots above the diagonal lines indicate a higher score  
7 at the 12-month follow-up. Scores from 7 participants are missing in EQ VAS.  
8  
9  
10  
11  
12  
13  
14  
15  
16  
17  
18  
19  
20  
21  
22  
23  
24  
25  
26  
27  
28  
29  
30  
31  
32  
33  
34  
35  
36  
37  
38  
39  
40  
41  
42  
43  
44  
45  
46  
47  
48  
49  
50  
51  
52  
53  
54  
55

56 **Table 1.** Background characteristics and self-reported comorbidity of participants.  
57  
58  
59  
60

| <i>n (%) unless otherwise stated</i>     | <b>Participants</b><br>n=74 | <b>Missing data*</b> |
|------------------------------------------|-----------------------------|----------------------|
| Age. Median (min-max) <sup>a</sup>       | 63 (25-89)                  |                      |
| Female <sup>a</sup>                      | 13 (18)                     |                      |
| Time to EMS in minutes. Median (min-max) | 7 (1-61)                    | 11                   |
| <b>Cardiac arrest circumstances</b>      |                             |                      |
| Cardiac aetiology <sup>a</sup>           | 62 (86)                     | 2                    |
| Cardiac arrest at home                   | 22 (30)                     |                      |
| CPR before arrival of EMS                | 41 (55)                     |                      |
| Initial rhythm: VF or VT                 | 61 (86)                     | 3                    |
| Witnessed cardiac arrest                 | 69 (95)                     | 1                    |
| <b>In-hospital interventions</b>         |                             |                      |
| CABG                                     | 5 (7)                       | 2                    |
| ICD <sup>a</sup>                         | 19 (27)                     | 4                    |
| Induced hypothermia (33°C) <sup>a</sup>  | 35 (49)                     | 2                    |
| PCI                                      | 39 (54)                     | 2                    |
| <b>Comorbidity**<sup>a</sup></b>         | 60 (81)                     |                      |
| Anaemia or other blood disease           | 0                           |                      |
| Back pain                                | 3 (4)                       |                      |
| Cancer                                   | 1 (1)                       |                      |
| Diabetes mellitus                        | 2 (3)                       |                      |
| Gastrointestinal disease                 | 5 (7)                       |                      |
| Heart disease                            | 54 (73)                     |                      |
| Hypertension                             | 27 (36)                     |                      |
| Liver disease                            | 1 (1)                       |                      |
| Osteoarthritis                           | 2 (3)                       |                      |

|                      |       |
|----------------------|-------|
| Pulmonary disease    | 3 (4) |
| Renal disease        | 0     |
| Rheumatoid arthritis | 1 (1) |

\* Number of participants where information is missing

\*\* Number of participants with self-reported treatment-requiring comorbidity

<sup>a</sup> Variables included as predictors in the univariate regression analyses

Abbreviations: VF, ventricular fibrillation; VT ventricular tachycardia; CRP, cardiopulmonary resuscitation; EMS, emergency medical service; PCI, percutaneous coronary intervention; CABG, coronary artery bypass grafting; ICD, implantable cardioverter defibrillator

**Table 2.** Comparison of mean scores at three and 12 months in the HADS and EQ-5D-3L (n=74).

|                 | <b>3 months</b>    | <b>12 months</b>   | Z-value | p      |
|-----------------|--------------------|--------------------|---------|--------|
|                 | Observed mean (SD) | Observed mean (SD) |         |        |
| <b>HADS</b>     |                    |                    |         |        |
| HADS-Anxiety    | 5.6 (±4.8)         | 4.7 (±4.3)         | 2.337   | 0.02*  |
| HADS-Depression | 3.4 (±3.5)         | 2.6 (±2.6)         | 2.199   | 0.03*  |
| Total score     | 9.0 (±7.8)         | 7.3 (±6.5)         | 2.579   | 0.01*  |
| <b>EQ-5D-3L</b> |                    |                    |         |        |
| EQ VAS (n=67)   | 73 (±18)           | 77 (±19)           | 2.292   | 0.02*  |
| Index value     | 0.82 (±0.26)       | 0.88 (±0.15)       | 2.966   | 0.003* |

\*  $p < 0.05$  indicates statistical significance

Abbreviations: HADS, hospital anxiety and depression scale; EQ-5D-3L, European quality of life 5 dimensions 3 level; SD, standard deviation; VAS, visual analogue scale

**Table 3.** Predictors of psychological distress and self-assessed poor health (n=70).

| Predictors                  | 3 months          |      |          |                       | 12 months          |      |          |                       |
|-----------------------------|-------------------|------|----------|-----------------------|--------------------|------|----------|-----------------------|
|                             | OR (95% CI)       | SE   | <i>p</i> | <i>R</i> <sup>2</sup> | OR (95% CI)        | SE   | <i>p</i> | <i>R</i> <sup>2</sup> |
| <b>HADS-Anxiety</b>         |                   |      |          |                       |                    |      |          |                       |
| Age                         | 0.99 (0.95-1.03)  | 0.02 | 0.63     | 0.195                 | 0.98 (0.93-1.03)   | 0.02 | 0.40     | 0.276                 |
| Comorbidity                 | 4.07 (1.07-17.00) | 0.73 | 0.04*    |                       | 3.79 (0.70-20.42)  | 0.86 | 0.12     |                       |
| Being female                | 4.94 (0.91-26.83) | 0.86 | 0.06     |                       | 9.23 (1.68-50.61)  | 0.78 | 0.01*    |                       |
| Hypothermia                 | 1.25 (0.43-3.62)  | 0.54 | 0.68     |                       | 1.20 (0.38-3.76)   | 0.58 | 0.75     |                       |
| <b>HADS-Depression</b>      |                   |      |          |                       |                    |      |          |                       |
| Age                         | 0.99 (0.94-1.04)  | 0.03 | 0.57     | 0.136                 | 0.99 (0.94-1.05)   | 0.03 | 0.81     | 0.300                 |
| Comorbidity                 | 1.45 (0.33-6.44)  | 0.76 | 0.62     |                       | 1.20 (0.25-5.85)   | 0.81 | 0.82     |                       |
| Being female                | 3.71 (0.90-15.37) | 0.78 | 0.07     |                       | 14.78 (2.60-83.87) | 0.87 | 0.002*   |                       |
| Hypothermia                 | 1.16 (0.37-3.61)  | 0.58 | 0.81     |                       | 2.75 (0.82-9.28)   | 0.62 | 0.10     |                       |
| ICD                         | 1.52 (0.40-5.69)  | 0.68 | 0.54     |                       | 0.55 (0.11-2.77)   | 0.82 | 0.47     |                       |
| <b>EQ-5D-3L index value</b> |                   |      |          |                       |                    |      |          |                       |
| Age                         | 0.91 (0.86-0.97)  | 0.03 | 0.002*   | 0.362                 | 0.93 (0.89-0.98)   | 0.02 | 0.003*   | 0.288                 |
| Comorbidity                 | 1.19 (0.28-5.01)  | 0.73 | 0.81     |                       | 2.53 (0.51-12.69)  | 0.82 | 0.26     |                       |
| Being female                | 6.33 (1.03-38.81) | 0.93 | 0.04*    |                       | 2.09 (0.46-9.40)   | 0.77 | 0.34     |                       |

\* *p* < 0.05 indicates statistical significance

Abbreviations: HADS, hospital anxiety and depression scale; EQ-5D-3L, European quality of life 5 dimensions 3 level; OR, odds ratio; SE, standard error; CI, confidence interval; ICD, implantable cardioverter defibrillator; PCI, percutaneous coronary

1  
2  
3  
4  
5  
6  
7  
8  
9  
10  
11  
12  
13  
14  
15  
16  
17  
18  
19  
20  
21  
22  
23  
24  
25  
26  
27  
28  
29  
30  
31  
32  
33  
34  
35  
36  
37  
38  
39  
40  
41  
42  
43  
44  
45  
46  
47  
48  
49  
50  
51  
52  
53  
54  
55  
56  
57  
58  
59  
60

---

intervention

---

For peer review only





<sup>1)</sup> Administrative reasons include survivors documented with an incorrect social security number, not able to be identified within 3 months or not residing in the region. OHCA-circumstances include trauma, attempted suicide, drowning and intoxication as cause of the cardiac arrest or severe illness afterwards.

Figure 1. Flowchart of study participants.

249x299mm (190 x 190 DPI)



Figure 2. Reported outcomes in the HADS and EQ-5D-3L at three and 12 months (n=74). Diagonal lines divide the participants with regard to what time they reported the highest score. Scores from 7 participants are missing in EQ VAS.

245x245mm (300 x 300 DPI)

**STROBE 2007 (v4) checklist of items to be included in reports of observational studies in epidemiology\***  
**Checklist for cohort, case-control, and cross-sectional studies (combined)**

| Section/Topic             | Item # | Recommendation                                                                                                                                                                                                                                                                                                                                                                                                                                                         | Reported on page #     |
|---------------------------|--------|------------------------------------------------------------------------------------------------------------------------------------------------------------------------------------------------------------------------------------------------------------------------------------------------------------------------------------------------------------------------------------------------------------------------------------------------------------------------|------------------------|
| Title and abstract        | 1      | (a) Indicate the study’s design with a commonly used term in the title or the abstract                                                                                                                                                                                                                                                                                                                                                                                 | 1                      |
|                           |        | (b) Provide in the abstract an informative and balanced summary of what was done and what was found                                                                                                                                                                                                                                                                                                                                                                    | 2                      |
| <b>Introduction</b>       |        |                                                                                                                                                                                                                                                                                                                                                                                                                                                                        |                        |
| Background/rationale      | 2      | Explain the scientific background and rationale for the investigation being reported                                                                                                                                                                                                                                                                                                                                                                                   | 3                      |
| Objectives                | 3      | State specific objectives, including any pre-specified hypotheses                                                                                                                                                                                                                                                                                                                                                                                                      | 3                      |
| <b>Methods</b>            |        |                                                                                                                                                                                                                                                                                                                                                                                                                                                                        |                        |
| Study design              | 4      | Present key elements of study design early in the paper                                                                                                                                                                                                                                                                                                                                                                                                                | 4-5                    |
| Setting                   | 5      | Describe the setting, locations, and relevant dates, including periods of recruitment, exposure, follow-up, and data collection                                                                                                                                                                                                                                                                                                                                        | 4                      |
| Participants              | 6      | (a) <i>Cohort study</i> —Give the eligibility criteria, and the sources and methods of selection of participants. Describe methods of follow-up<br><i>Case-control study</i> —Give the eligibility criteria, and the sources and methods of case ascertainment and control selection. Give the rationale for the choice of cases and controls<br><i>Cross-sectional study</i> —Give the eligibility criteria, and the sources and methods of selection of participants | 4                      |
|                           |        | (b) <i>Cohort study</i> —For matched studies, give matching criteria and number of exposed and unexposed<br><i>Case-control study</i> —For matched studies, give matching criteria and the number of controls per case                                                                                                                                                                                                                                                 |                        |
| Variables                 | 7      | Clearly define all outcomes, exposures, predictors, potential confounders, and effect modifiers. Give diagnostic criteria, if applicable                                                                                                                                                                                                                                                                                                                               | 4-5                    |
| Data sources/ measurement | 8*     | For each variable of interest, give sources of data and details of methods of assessment (measurement). Describe comparability of assessment methods if there is more than one group                                                                                                                                                                                                                                                                                   | 4-5                    |
| Bias                      | 9      | Describe any efforts to address potential sources of bias                                                                                                                                                                                                                                                                                                                                                                                                              | Not applicable         |
| Study size                | 10     | Explain how the study size was arrived at                                                                                                                                                                                                                                                                                                                                                                                                                              | 4                      |
| Quantitative variables    | 11     | Explain how quantitative variables were handled in the analyses. If applicable, describe which groupings were chosen and why                                                                                                                                                                                                                                                                                                                                           | 5-6                    |
| Statistical methods       | 12     | (a) Describe all statistical methods, including those used to control for confounding                                                                                                                                                                                                                                                                                                                                                                                  | 5-6                    |
|                           |        | (b) Describe any methods used to examine subgroups and interactions                                                                                                                                                                                                                                                                                                                                                                                                    | Not applicable         |
|                           |        | (c) Explain how missing data were addressed                                                                                                                                                                                                                                                                                                                                                                                                                            | See tables and figures |
|                           |        | (d) <i>Cohort study</i> —If applicable, explain how loss to follow-up was addressed<br><i>Case-control study</i> —If applicable, explain how matching of cases and controls was addressed                                                                                                                                                                                                                                                                              | 6                      |

|                          |     |                                                                                                                                                                                                              |                |
|--------------------------|-----|--------------------------------------------------------------------------------------------------------------------------------------------------------------------------------------------------------------|----------------|
|                          |     | <i>Cross-sectional study</i> —If applicable, describe analytical methods taking account of sampling strategy                                                                                                 |                |
|                          |     | (e) Describe any sensitivity analyses                                                                                                                                                                        | Not applicable |
| <b>Results</b>           |     |                                                                                                                                                                                                              |                |
| Participants             | 13* | (a) Report numbers of individuals at each stage of study—eg numbers potentially eligible, examined for eligibility, confirmed eligible, included in the study, completing follow-up, and analysed            | 6              |
|                          |     | (b) Give reasons for non-participation at each stage                                                                                                                                                         | 6              |
|                          |     | (c) Consider use of a flow diagram                                                                                                                                                                           | 6              |
| Descriptive data         | 14* | (a) Give characteristics of study participants (eg demographic, clinical, social) and information on exposures and potential confounders                                                                     | 6              |
|                          |     | (b) Indicate number of participants with missing data for each variable of interest                                                                                                                          | 6              |
|                          |     | (c) <i>Cohort study</i> —Summarise follow-up time (eg, average and total amount)                                                                                                                             | 6              |
| Outcome data             | 15* | <i>Cohort study</i> —Report numbers of outcome events or summary measures over time                                                                                                                          | Not applicable |
|                          |     | <i>Case-control study</i> —Report numbers in each exposure category, or summary measures of exposure                                                                                                         | Not applicable |
|                          |     | <i>Cross-sectional study</i> —Report numbers of outcome events or summary measures                                                                                                                           | Not applicable |
| Main results             | 16  | (a) Give unadjusted estimates and, if applicable, confounder-adjusted estimates and their precision (eg, 95% confidence interval). Make clear which confounders were adjusted for and why they were included | 7              |
|                          |     | (b) Report category boundaries when continuous variables were categorized                                                                                                                                    | 7              |
|                          |     | (c) If relevant, consider translating estimates of relative risk into absolute risk for a meaningful time period                                                                                             | Not applicable |
| Other analyses           | 17  | Report other analyses done—eg analyses of subgroups and interactions, and sensitivity analyses                                                                                                               | Not applicable |
| <b>Discussion</b>        |     |                                                                                                                                                                                                              |                |
| Key results              | 18  | Summarise key results with reference to study objectives                                                                                                                                                     | 7-8            |
| Limitations              | 19  | Discuss limitations of the study, taking into account sources of potential bias or imprecision. Discuss both direction and magnitude of any potential bias                                                   | 9              |
| Interpretation           | 20  | Give a cautious overall interpretation of results considering objectives, limitations, multiplicity of analyses, results from similar studies, and other relevant evidence                                   | 8-9            |
| Generalisability         | 21  | Discuss the generalisability (external validity) of the study results                                                                                                                                        | 8-9            |
| <b>Other information</b> |     |                                                                                                                                                                                                              |                |
| Funding                  | 22  | Give the source of funding and the role of the funders for the present study and, if applicable, for the original study on which the present article is based                                                | 10             |

\*Give information separately for cases and controls in case-control studies and, if applicable, for exposed and unexposed groups in cohort and cross-sectional studies.

**Note:** An Explanation and Elaboration article discusses each checklist item and gives methodological background and published examples of transparent reporting. The STROBE checklist is best used in conjunction with this article (freely available on the Web sites of PLoS Medicine at <http://www.plosmedicine.org/>, Annals of Internal Medicine at <http://www.annals.org/>, and Epidemiology at <http://www.epidem.com/>). Information on the STROBE Initiative is available at [www.strobe-statement.org](http://www.strobe-statement.org).
